# Supplementary material for: Prediction on Mechanical Properties of Non-Equiatomic High-Entropy Alloy by Atomistic Simulation and Machine Learning
Source: MDPI journal article supplement (doi:10.3390/met11060922), 2021-06-06
Supplement: s1 [file s1]

# Supplementary Materials

## Section S1. Evaluation Metrics

Due to the imbalanced characteristic of our proposed database, we use the unweighted average recall (UAR) as our main metric to evaluate the model's performance. Firstly, let us define the *recall* (aka. class-wise accuracy) of the  $i$ -th class as:

$$Recall_i = \frac{\bar{N}_i}{N_i}$$

where  $\bar{N}_i$  and  $N_i$  are the correctly recognized instance number and the total instance number of the  $i$ -th class, respectively. The weighted average recall (WAR) is defined as:

$$WAR = \sum_{i=1}^{N_c} \lambda_i Recall_i$$
$$\lambda_i = \frac{N_i}{N}$$

where  $N_c$  and  $N$  are the number of classes in the task and the total number of instances, respectively. We know that, if the data distribution is extremely imbalanced, an ML model will usually be trained much stronger in recognizing the classes which occupy a larger percentage than the other classes in the total dataset. Therefore, using WAR (or accuracy) to evaluate the final performance for an imbalanced dataset could be overoptimistic. In contrast, the UAR is defined as:

$$UAR = \frac{\sum_{i=1}^{N_c} Recall_i}{N_c}$$

We can see that, for a balanced dataset (i.e.,  $\lambda_i$  is a constant), WAR is equal to UAR. Considering our task is a binary classification problem, we also provide a series of complementary evaluation metrics. They are defined as:

$$\text{sensitivity} = \frac{TP}{TP + FN}$$

$$\text{specificity} = \frac{TN}{TN + FP}$$

$$\text{precision} = \frac{TP}{TP + FP}$$

$$F1 \text{ score} = 2 \cdot \frac{\text{precision} \cdot \text{sensitivity}}{\text{precision} + \text{sensitivity}} = \frac{2TP}{2TP + FP + FN}$$

where TP, TN, FP, and FN are the number of *true positive* (“Good” correctly identified as “Good”), *true negative* (“Weak” correctly identified as “Weak”), *false positive* (“Weak” incorrectly identified as “Good”), and *false negative* (“Good” incorrectly identified as “Weak”), respectively.

## Section S2. Hyper-parameters optimization

The hyper-parameters of all ML models are tuned and optimized on the dev set based on the performance (UAR). We use a grid-search strategy to decide on the optimal hyper-parameter for a specific ML model. All the ML models (except SVM) are implemented by the MATLAB (R2019a) *Statistics and Machine Learning Toolbox* [1], MATLAB (R2019a) *Deep Learning Toolbox* [2], and MATLAB (K)ELM Codes [3]. The SVM model is implemented by the LIBSVM Toolkit [4]. We use the default hyper-parameters designed in these tools except if claimed as follows.

Table S1 shows the grid search strategy we use for optimizing the hyper-parameters of the ML models. From Fig. S1 we can see that, optimization of the hyper-parameters is necessary for building an efficient ML model. All the hyper-parameters of the models are tuned and optimized based on their performance (UARs) on the dev set. Then, the optimal hyper-parameter will be applied to train a new model based on the combination of the train and dev sets. Finally, the test set (unseen) will be evaluated by this new model.

Table S2 shows the optimal hyper-parameters selected for evaluating the final ML models on the test set. When tuning the hyper-parameters by the grid search strategy, the earliest value (calculating from the start point of the grid) will be selected if there is more than one peak value (i.e., highest UAR) achieved in the whole grid.

[1] MATLAB (R2019a): [Statistics and Machine Learning Toolbox](#), MathWorks, Inc., Natick, MA, USA.

[2] MATLAB (R2019a): [Deep Learning Toolbox](#), MathWorks, Inc., Natick, MA, USA.

[3] MATLAB (K)ELM Codes: [Basic ELM Algorithms \(MATLAB Version\)](#), Nanyang Technological University, Singapore.

[4] C.-C. Chang and C.-J. Lin, “LIBSVM: A library for support vector machines”, *ACM Transactions on Intelligent Systems and Technology*, vol. 2, pp. 27:1-27:27, 2011,  
software available at <https://www.csie.ntu.edu.tw/~cjlin/libsvm/>.

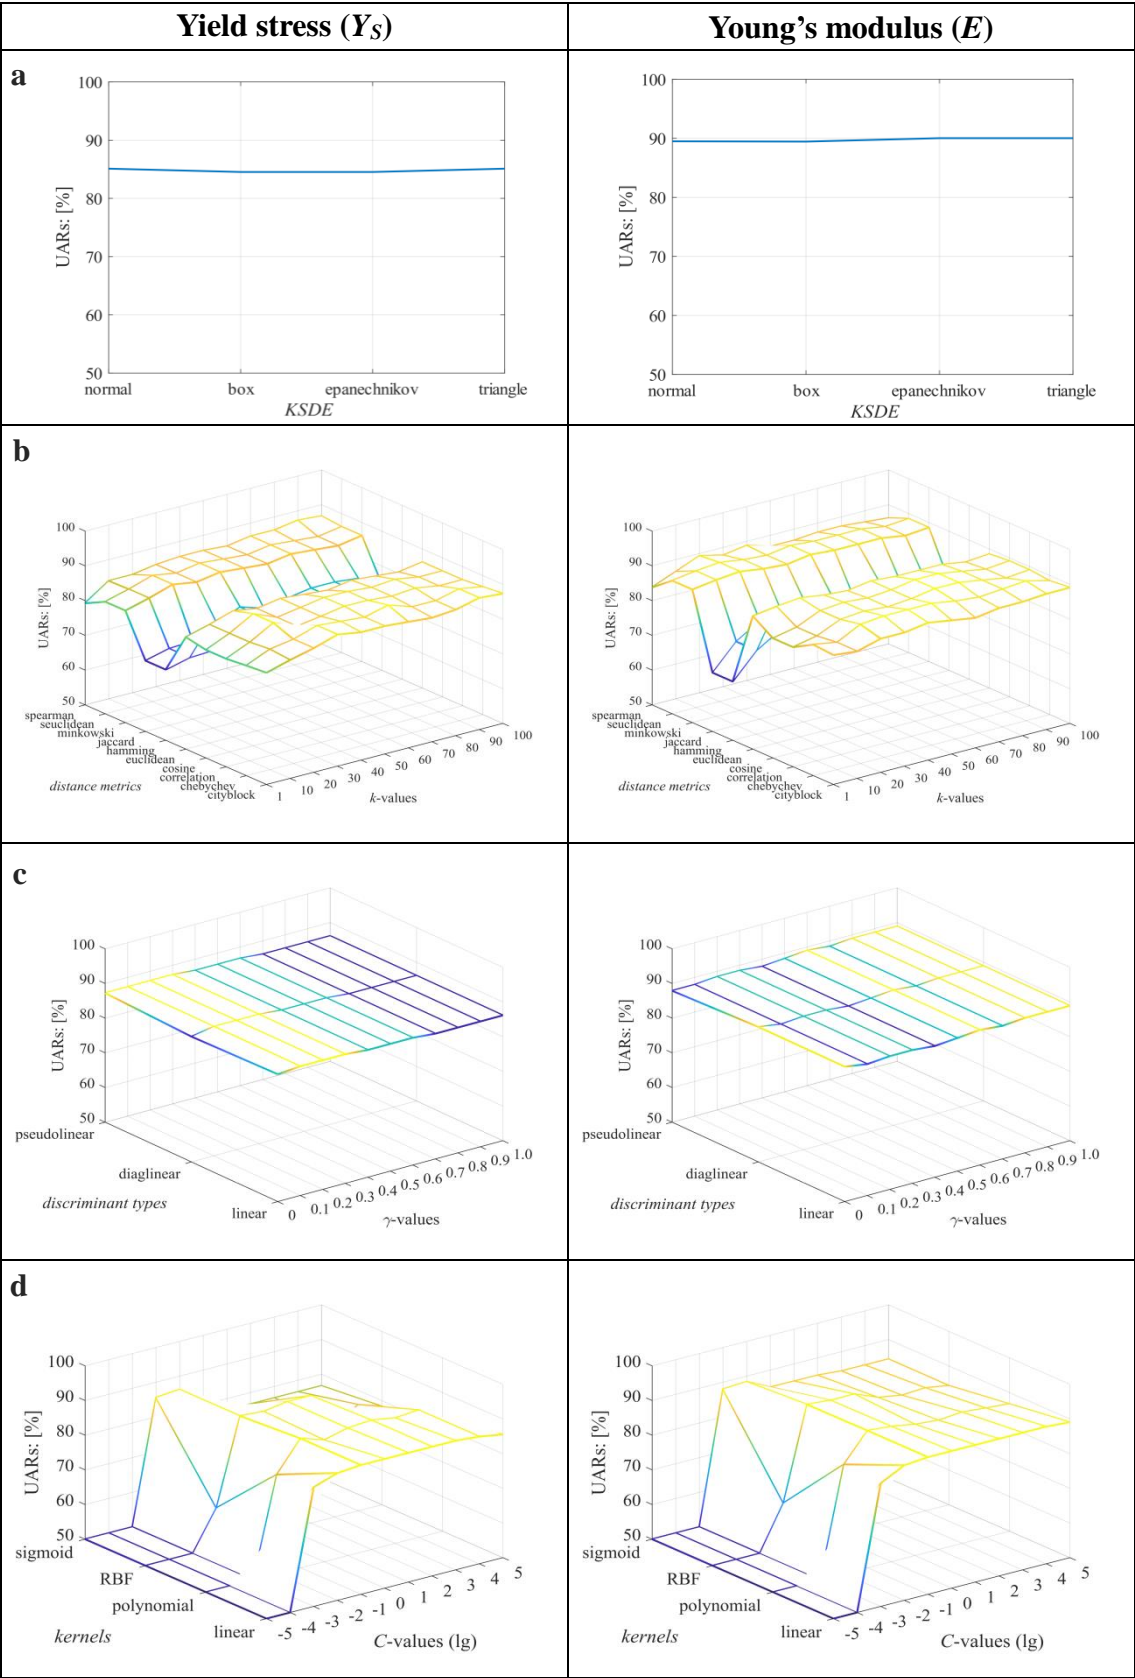

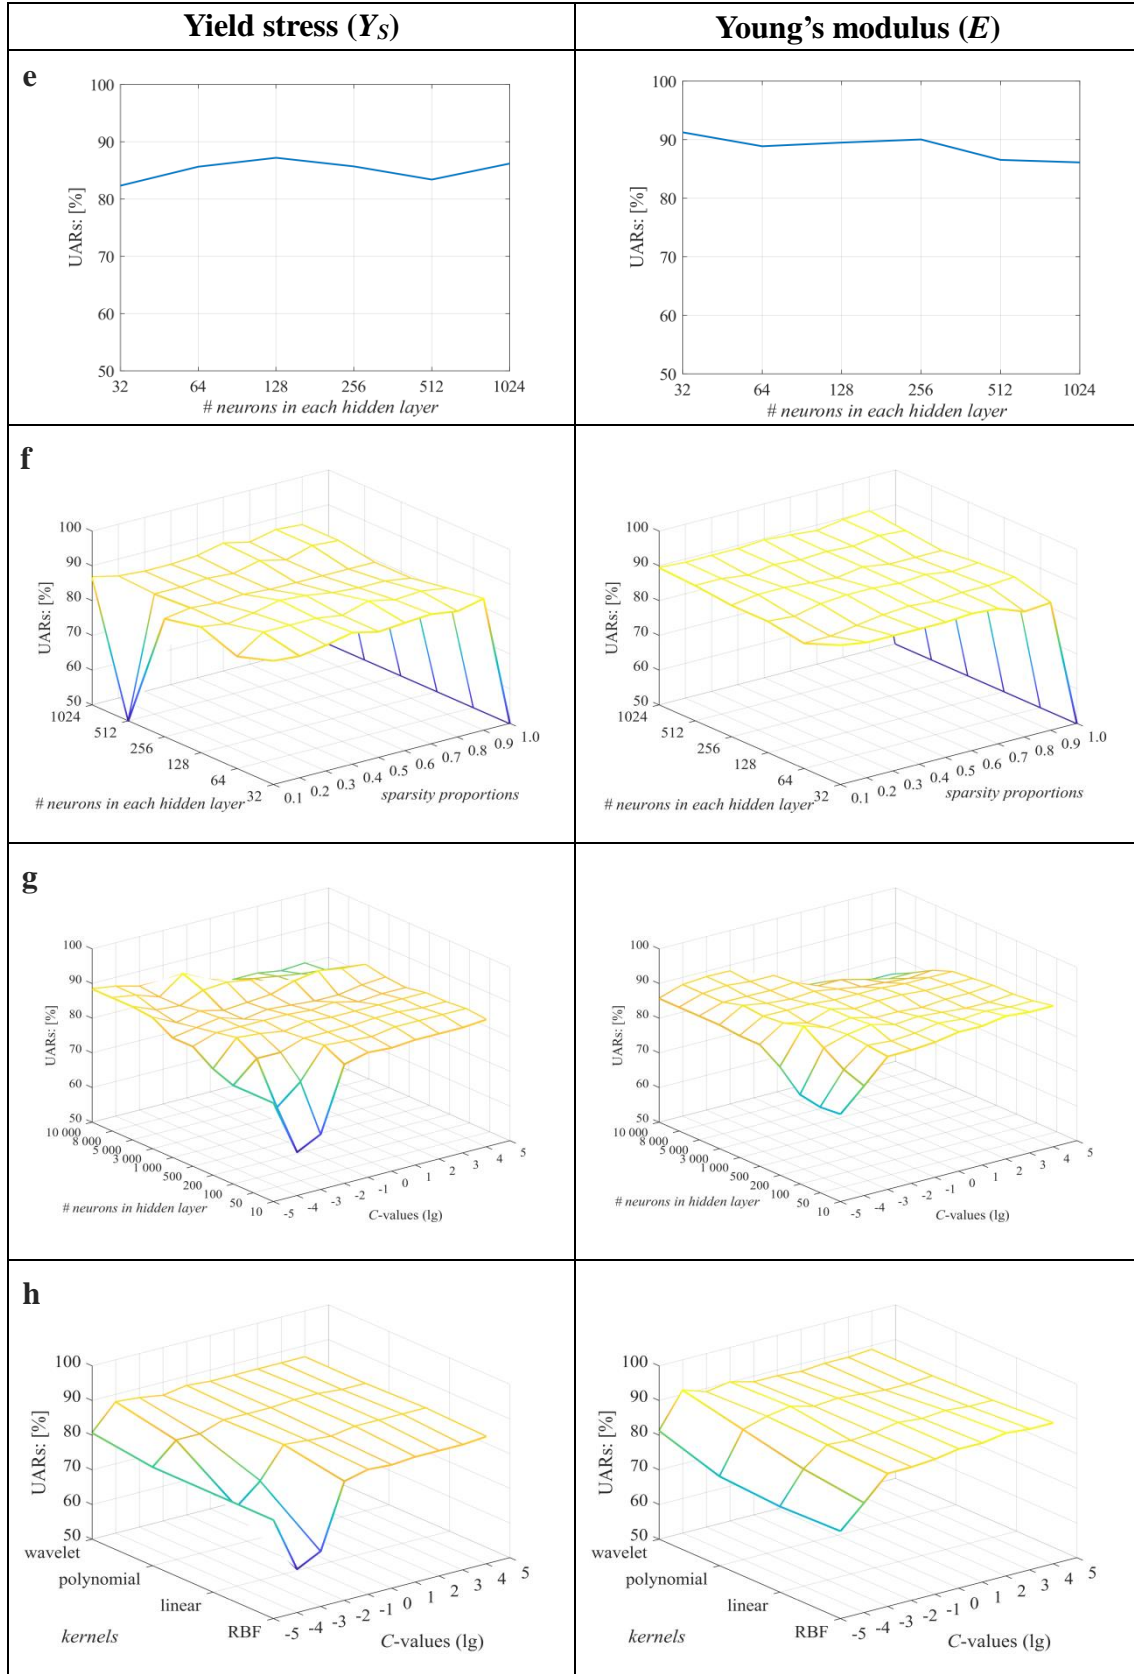

**Fig. S1.** The hyper-parameters tuning process for yield stress and the Young's modulus by different ML models. (a) NB model, (b)  $k$ -NN model, (c) LDA model, (d) SVM model, (e) DNN model, (f) SAE model, (g) ELM model, and (h) KELM model.

**Table S1.** Grid search for optimizing the hyper-Parameters of the ML models.

| <b>ML Models</b> | <b>Hyper-Parameters</b>                                                                                                                                                                                                                                               |
|------------------|-----------------------------------------------------------------------------------------------------------------------------------------------------------------------------------------------------------------------------------------------------------------------|
| <b>NB</b>        | <i>kernel smoothing density estimate (KSDE):</i> {"normal", "box", "epanechnikov", "triangle"}.                                                                                                                                                                       |
| <b>k-NN</b>      | <i>k-values:</i> {1, 10, 20, 30, 40, 50, 60, 70, 80, 90, 100};<br><i>distance metric:</i> {"cityblock", "chebychev", "correlation", "cosine", "euclidean", "hamming", "jaccard", "minkowski", "seuclidean", "spearman"}.                                              |
| <b>LDA</b>       | <i>discriminant types:</i> {"linear", "diaglinear", "pseudolinear"};<br><i><math>\gamma</math>-values:</i> {0.0, 0.1, 0.2, 0.3, 0.4, 0.5, 0.6, 0.7, 0.8, 0.9, 1.0}.                                                                                                   |
| <b>SVM</b>       | <i>kernel types:</i> {"linear", "polynomial", "RBF", "sigmoid"};<br><i>C-values:</i> { $10^{-5}$ , $10^{-4}$ , $10^{-3}$ , $10^{-2}$ , $10^{-1}$ , $10^0$ , $10^1$ , $10^2$ , $10^3$ , $10^4$ , $10^5$ }.                                                             |
| <b>DNN</b>       | <i>4 hidden layers:</i> {[32-32-32-32], [64-64-64-64], [128-128-128-128], [256-256-256-256], [512-512-512-512], [1024-1024-1024-1024]}                                                                                                                                |
| <b>SAE</b>       | <i>2 hidden layers (# neurons):</i> {[32-32], [64-64], [128-128], [256-256], [512-512], [1024-1024]}; <i>sparsity proportions:</i> {0.1, 0.2, 0.3, 0.4, 0.5, 0.6, 0.7, 0.8, 0.9, 1.0};<br><i>L2 weight regularisation:</i> 0.0001; <i>sparsity regularisation:</i> 2. |
| <b>ELM</b>       | <i>activation function:</i> "sigmoid"; <i>hidden layer sizes (# neurons):</i> {10, 50, 100, 200, 500, 1 000, 3 000, 5 000, 8 000, 10 000}; <i>C-values:</i> same as in SVM.                                                                                           |
| <b>KELM</b>      | <i>kernel types:</i> {"linear", "polynomial", "RBF", "wavelet"};<br><i>C-values:</i> same as in SVM; <i>kernel parameters:</i> [1, 10, 100].                                                                                                                          |

**Table S2.** The optimal hyper-parameters selected for evaluating the ML models on the test set.

| ML Models          |                                                              | $Y_s$               | $E$               |
|--------------------|--------------------------------------------------------------|---------------------|-------------------|
| <b>NB</b>          | <i>KSDE</i>                                                  | “normal”            | “epanechnikov”    |
| <b><i>k</i>-NN</b> | <i>k</i> -value<br><i>distance metric</i>                    | 60<br>“chebychev”   | 50<br>“chebychev” |
| <b>LDA</b>         | <i>discriminant type</i><br>$\gamma$ -value                  | “pseudolinear”<br>0 | “linear”<br>0.6   |
| <b>SVM</b>         | <i>kernel type</i><br><i>C</i> -value                        | “polynomial”<br>0.1 | “linear”<br>0.1   |
| <b>DNN</b>         | # neurons in each hidden layer                               | 128                 | 32                |
| <b>SAE</b>         | <i>sparsity proportion</i><br># neurons in each hidden layer | 0.6<br>64           | 0.9<br>1024       |
| <b>ELM</b>         | # neurons in hidden layer<br><i>C</i> -value                 | 200<br>1 000        | 50<br>0.01        |
| <b>KELM</b>        | <i>kernel type</i><br><i>C</i> -value                        | “linear”<br>0.00001 | “RBF”<br>0.1      |

# **Supplementary Database**

| [100] | Cu% | Fe% | Ni% | Cr% | Co% | E (Gpa) | Ys (Gpa) |
|-------|-----|-----|-----|-----|-----|---------|----------|
| a     | 20  | 20  | 20  | 20  | 20  | 118.71  | 18.26    |
| 1     | 34  | 11  | 13  | 30  | 12  | 112.17  | 16.22    |
| 2     | 11  | 15  | 10  | 35  | 29  | 111.81  | 14.29    |
| 3     | 16  | 23  | 21  | 19  | 21  | 120.56  | 18.54    |
| 4     | 30  | 18  | 9   | 14  | 29  | 102.63  | 15.80    |
| 5     | 15  | 31  | 14  | 8   | 32  | 107.59  | 18.00    |
| 6     | 29  | 17  | 21  | 17  | 16  | 115.88  | 17.08    |
| 7     | 27  | 19  | 34  | 8   | 12  | 126.57  | 17.75    |
| 8     | 26  | 23  | 26  | 17  | 8   | 118.96  | 18.37    |
| 9     | 8   | 30  | 33  | 15  | 14  | 132.16  | 20.56    |
| 10    | 32  | 8   | 29  | 9   | 22  | 123.27  | 16.19    |
| 11    | 17  | 7   | 18  | 34  | 24  | 121.93  | 14.64    |
| 12    | 17  | 25  | 24  | 5   | 29  | 120.92  | 18.00    |
| 13    | 29  | 30  | 13  | 6   | 22  | 96.72   | 17.12    |
| 14    | 20  | 29  | 20  | 26  | 5   | 115.60  | 19.74    |
| 15    | 32  | 19  | 7   | 32  | 10  | 100.39  | 16.84    |
| 16    | 27  | 26  | 17  | 24  | 6   | 110.00  | 18.40    |
| 17    | 10  | 26  | 14  | 15  | 35  | 112.59  | 16.11    |
| 18    | 23  | 34  | 19  | 5   | 19  | 105.97  | 18.13    |
| 19    | 31  | 18  | 9   | 22  | 20  | 104.87  | 16.30    |
| 20    | 23  | 17  | 21  | 21  | 18  | 116.30  | 17.87    |
| 21    | 23  | 17  | 22  | 32  | 6   | 121.26  | 18.69    |
| 22    | 24  | 32  | 9   | 22  | 13  | 97.98   | 18.32    |
| 23    | 20  | 23  | 16  | 34  | 7   | 113.04  | 19.08    |
| 24    | 22  | 8   | 10  | 31  | 29  | 111.96  | 14.32    |
| 25    | 10  | 33  | 22  | 6   | 29  | 116.82  | 18.87    |
| 26    | 18  | 20  | 6   | 23  | 33  | 108.35  | 16.16    |
| 27    | 27  | 8   | 20  | 14  | 31  | 120.51  | 15.46    |
| 28    | 15  | 23  | 14  | 27  | 21  | 112.53  | 18.39    |
| 29    | 32  | 9   | 6   | 34  | 19  | 104.29  | 16.03    |
| 30    | 14  | 20  | 9   | 35  | 22  | 110.74  | 17.30    |
| 31    | 24  | 17  | 21  | 28  | 10  | 117.61  | 18.33    |
| 32    | 27  | 30  | 8   | 20  | 15  | 96.28   | 17.60    |
| 33    | 20  | 31  | 6   | 17  | 26  | 96.59   | 18.10    |
| 34    | 11  | 25  | 18  | 14  | 32  | 115.96  | 16.90    |
| 35    | 15  | 9   | 19  | 30  | 27  | 122.94  | 14.57    |
| 36    | 13  | 19  | 35  | 13  | 20  | 132.02  | 18.59    |
| 37    | 12  | 29  | 20  | 15  | 24  | 118.55  | 18.65    |
| 38    | 16  | 21  | 23  | 23  | 17  | 123.19  | 18.74    |
| 39    | 8   | 23  | 29  | 20  | 20  | 132.70  | 18.27    |
| 40    | 9   | 30  | 13  | 22  | 26  | 112.99  | 18.02    |
| 41    | 10  | 21  | 17  | 30  | 22  | 120.91  | 17.10    |
| 42    | 27  | 7   | 21  | 26  | 19  | 119.23  | 16.86    |
| 43    | 15  | 6   | 25  | 25  | 29  | 128.78  | 14.25    |
| 44    | 26  | 7   | 32  | 25  | 10  | 131.66  | 17.77    |
| 45    | 26  | 10  | 15  | 21  | 28  | 114.75  | 16.14    |
| 46    | 22  | 19  | 7   | 23  | 29  | 105.23  | 16.92    |
| 47    | 11  | 26  | 22  | 12  | 29  | 119.27  | 17.64    |
| 48    | 20  | 20  | 22  | 15  | 23  | 120.16  | 18.09    |
| 49    | 26  | 33  | 21  | 9   | 11  | 103.64  | 18.27    |
| 50    | 15  | 8   | 26  | 25  | 26  | 127.70  | 14.83    |
| 51    | 21  | 18  | 6   | 22  | 33  | 99.57   | 16.07    |
| 52    | 34  | 32  | 6   | 6   | 22  | 86.66   | 16.11    |



|     |    |    |    |    |    |        |       |
|-----|----|----|----|----|----|--------|-------|
| 53  | 31 | 20 | 15 | 28 | 6  | 108.22 | 17.21 |
| 54  | 13 | 15 | 9  | 35 | 28 | 113.21 | 14.65 |
| 55  | 11 | 32 | 34 | 14 | 9  | 131.64 | 21.20 |
| 56  | 24 | 18 | 33 | 18 | 7  | 130.21 | 18.51 |
| 57  | 24 | 23 | 14 | 13 | 26 | 106.32 | 17.08 |
| 58  | 7  | 21 | 27 | 21 | 24 | 129.38 | 16.80 |
| 59  | 15 | 8  | 33 | 20 | 24 | 133.35 | 15.75 |
| 60  | 9  | 21 | 35 | 22 | 13 | 135.53 | 19.27 |
| 61  | 11 | 33 | 10 | 31 | 15 | 109.20 | 19.74 |
| 62  | 13 | 12 | 15 | 34 | 26 | 118.36 | 14.63 |
| 63  | 5  | 14 | 24 | 32 | 25 | 128.93 | 14.44 |
| 64  | 32 | 9  | 33 | 5  | 21 | 124.23 | 16.32 |
| 65  | 28 | 19 | 5  | 30 | 18 | 105.64 | 16.63 |
| 66  | 21 | 16 | 25 | 18 | 20 | 122.44 | 17.96 |
| 67  | 27 | 9  | 25 | 19 | 20 | 123.08 | 16.78 |
| 68  | 34 | 23 | 31 | 7  | 5  | 117.88 | 16.85 |
| 69  | 23 | 8  | 21 | 18 | 30 | 121.52 | 15.07 |
| 70  | 15 | 25 | 15 | 35 | 10 | 113.59 | 19.51 |
| 71  | 5  | 32 | 26 | 18 | 19 | 130.34 | 19.77 |
| 72  | 29 | 21 | 23 | 10 | 17 | 112.06 | 17.01 |
| 73  | 10 | 24 | 26 | 19 | 21 | 124.24 | 18.69 |
| 74  | 7  | 31 | 19 | 11 | 32 | 116.99 | 17.46 |
| 75  | 23 | 33 | 14 | 9  | 21 | 102.80 | 18.15 |
| 76  | 13 | 8  | 25 | 34 | 20 | 127.19 | 15.16 |
| 77  | 19 | 27 | 29 | 9  | 16 | 124.51 | 19.65 |
| 78  | 10 | 10 | 20 | 29 | 31 | 125.64 | 13.91 |
| 79  | 24 | 22 | 28 | 21 | 5  | 119.67 | 18.56 |
| 80  | 25 | 15 | 19 | 25 | 16 | 115.02 | 17.72 |
| 81  | 10 | 7  | 24 | 29 | 30 | 128.48 | 13.97 |
| 82  | 6  | 29 | 26 | 24 | 15 | 130.62 | 19.65 |
| 83  | 20 | 32 | 15 | 11 | 22 | 104.80 | 18.75 |
| 84  | 12 | 8  | 29 | 18 | 33 | 127.46 | 14.18 |
| 85  | 13 | 34 | 5  | 14 | 34 | 98.27  | 17.62 |
| 86  | 23 | 22 | 18 | 31 | 6  | 110.90 | 18.26 |
| 87  | 28 | 19 | 22 | 22 | 9  | 117.33 | 17.65 |
| 88  | 11 | 22 | 15 | 29 | 23 | 119.07 | 17.31 |
| 89  | 19 | 6  | 30 | 22 | 23 | 128.73 | 15.64 |
| 90  | 9  | 5  | 35 | 29 | 22 | 135.97 | 14.80 |
| 91  | 23 | 19 | 20 | 27 | 11 | 120.43 | 18.26 |
| 92  | 10 | 17 | 27 | 26 | 20 | 127.50 | 17.08 |
| 93  | 19 | 15 | 26 | 8  | 32 | 125.81 | 16.35 |
| 94  | 26 | 35 | 11 | 8  | 20 | 94.17  | 17.06 |
| 95  | 22 | 29 | 7  | 27 | 15 | 103.66 | 18.20 |
| 96  | 14 | 11 | 19 | 22 | 34 | 119.83 | 14.01 |
| 97  | 13 | 27 | 13 | 14 | 33 | 112.34 | 17.11 |
| 98  | 21 | 12 | 30 | 22 | 15 | 127.17 | 18.20 |
| 99  | 22 | 32 | 23 | 9  | 14 | 112.59 | 19.06 |
| 100 | 12 | 26 | 18 | 27 | 17 | 118.22 | 19.11 |

| [110] | Cu% | Fe% | Ni% | Cr% | Co% | E (Gpa) | Ys (Gpa) |
|-------|-----|-----|-----|-----|-----|---------|----------|
| b     | 20  | 20  | 20  | 20  | 20  | 192.27  | 7.66     |
| 101   | 34  | 19  | 25  | 13  | 9   | 182.70  | 8.22     |
| 102   | 29  | 8   | 22  | 22  | 19  | 196.19  | 7.17     |
| 103   | 22  | 15  | 10  | 32  | 21  | 184.72  | 7.02     |
| 104   | 10  | 25  | 23  | 26  | 16  | 198.62  | 8.19     |
| 105   | 6   | 6   | 33  | 30  | 25  | 218.43  | 7.37     |
| 106   | 5   | 29  | 9   | 30  | 27  | 186.62  | 7.24     |
| 107   | 27  | 16  | 26  | 24  | 7   | 191.38  | 8.38     |
| 108   | 20  | 26  | 8   | 12  | 34  | 171.70  | 6.38     |
| 109   | 28  | 21  | 11  | 5   | 35  | 174.70  | 6.14     |
| 110   | 34  | 23  | 9   | 21  | 13  | 165.45  | 7.62     |
| 111   | 12  | 30  | 19  | 16  | 23  | 191.06  | 7.58     |
| 112   | 33  | 9   | 7   | 30  | 21  | 179.96  | 6.56     |
| 113   | 31  | 28  | 8   | 28  | 5   | 161.07  | 8.63     |
| 114   | 30  | 18  | 22  | 20  | 10  | 184.91  | 8.16     |
| 115   | 20  | 33  | 6   | 15  | 26  | 162.03  | 7.16     |
| 116   | 30  | 19  | 19  | 8   | 24  | 182.67  | 6.96     |
| 117   | 18  | 7   | 35  | 29  | 11  | 213.12  | 8.19     |
| 118   | 22  | 28  | 15  | 23  | 12  | 186.04  | 8.17     |
| 119   | 31  | 35  | 12  | 15  | 7   | 159.90  | 8.81     |
| 120   | 22  | 21  | 18  | 21  | 18  | 183.07  | 7.66     |
| 121   | 8   | 35  | 8   | 35  | 14  | 186.44  | 8.42     |
| 122   | 24  | 19  | 20  | 15  | 22  | 186.31  | 7.34     |
| 123   | 21  | 6   | 11  | 30  | 32  | 191.18  | 6.16     |
| 124   | 16  | 16  | 28  | 7   | 33  | 208.21  | 7.00     |
| 125   | 19  | 11  | 30  | 33  | 7   | 207.51  | 8.49     |
| 126   | 16  | 6   | 15  | 34  | 29  | 198.56  | 6.51     |
| 127   | 18  | 19  | 8   | 24  | 31  | 185.36  | 6.50     |
| 128   | 22  | 35  | 12  | 19  | 12  | 170.84  | 8.64     |
| 129   | 6   | 11  | 35  | 22  | 26  | 218.41  | 7.56     |
| 130   | 22  | 24  | 35  | 9   | 10  | 199.52  | 8.89     |
| 131   | 20  | 33  | 32  | 10  | 5   | 190.75  | 9.78     |
| 132   | 21  | 33  | 10  | 31  | 5   | 169.07  | 9.15     |
| 133   | 24  | 23  | 6   | 25  | 22  | 172.28  | 7.12     |
| 134   | 7   | 32  | 20  | 14  | 27  | 192.48  | 7.54     |
| 135   | 21  | 18  | 27  | 23  | 11  | 199.50  | 8.37     |
| 136   | 19  | 16  | 25  | 6   | 34  | 196.96  | 6.73     |
| 137   | 26  | 18  | 7   | 26  | 23  | 175.49  | 6.88     |
| 138   | 34  | 5   | 20  | 27  | 14  | 193.83  | 7.21     |
| 139   | 14  | 19  | 21  | 16  | 30  | 201.47  | 7.06     |
| 140   | 11  | 26  | 23  | 18  | 22  | 199.07  | 7.86     |
| 141   | 33  | 27  | 12  | 15  | 13  | 165.03  | 7.89     |
| 142   | 16  | 18  | 22  | 17  | 27  | 196.42  | 7.29     |
| 143   | 18  | 18  | 27  | 26  | 11  | 205.11  | 8.37     |
| 144   | 13  | 19  | 27  | 12  | 29  | 206.28  | 7.31     |
| 145   | 6   | 34  | 30  | 11  | 19  | 209.60  | 8.69     |
| 146   | 17  | 23  | 30  | 11  | 19  | 200.24  | 8.13     |
| 147   | 21  | 8   | 30  | 7   | 34  | 206.47  | 6.76     |
| 148   | 16  | 17  | 21  | 22  | 24  | 195.15  | 7.33     |
| 149   | 30  | 11  | 18  | 31  | 10  | 184.04  | 7.80     |
| 150   | 9   | 10  | 28  | 24  | 29  | 211.37  | 7.08     |
| 151   | 31  | 8   | 10  | 32  | 19  | 183.52  | 6.85     |
| 152   | 20  | 29  | 7   | 33  | 11  | 177.10  | 8.37     |

|     |    |    |    |    |    |        |      |
|-----|----|----|----|----|----|--------|------|
| 153 | 26 | 9  | 9  | 22 | 34 | 185.12 | 6.00 |
| 154 | 27 | 28 | 6  | 10 | 29 | 167.27 | 6.62 |
| 155 | 17 | 30 | 13 | 23 | 17 | 176.74 | 7.94 |
| 156 | 16 | 24 | 31 | 20 | 9  | 200.49 | 8.98 |
| 157 | 9  | 22 | 24 | 26 | 19 | 199.35 | 7.89 |
| 158 | 32 | 25 | 10 | 19 | 14 | 162.35 | 7.64 |
| 159 | 28 | 14 | 13 | 32 | 13 | 183.15 | 7.57 |
| 160 | 12 | 22 | 11 | 32 | 23 | 191.49 | 7.28 |
| 161 | 24 | 25 | 32 | 8  | 11 | 191.89 | 8.80 |
| 162 | 32 | 23 | 8  | 12 | 25 | 167.09 | 6.68 |
| 163 | 14 | 24 | 23 | 26 | 13 | 197.04 | 8.40 |
| 164 | 6  | 12 | 27 | 32 | 23 | 214.25 | 7.45 |
| 165 | 28 | 8  | 27 | 21 | 16 | 201.82 | 7.47 |
| 166 | 18 | 15 | 28 | 29 | 10 | 204.55 | 8.24 |
| 167 | 28 | 9  | 20 | 14 | 29 | 196.45 | 6.60 |
| 168 | 24 | 28 | 10 | 28 | 10 | 169.06 | 8.31 |
| 169 | 14 | 20 | 19 | 20 | 27 | 199.53 | 7.23 |
| 170 | 31 | 31 | 6  | 22 | 10 | 157.90 | 8.29 |
| 171 | 21 | 13 | 34 | 21 | 11 | 206.51 | 8.42 |
| 172 | 26 | 25 | 5  | 27 | 17 | 173.19 | 7.45 |
| 173 | 15 | 8  | 27 | 32 | 18 | 211.37 | 7.54 |
| 174 | 26 | 12 | 20 | 26 | 16 | 191.86 | 7.46 |
| 175 | 30 | 7  | 20 | 27 | 16 | 188.31 | 7.33 |
| 176 | 30 | 23 | 5  | 24 | 18 | 164.44 | 7.27 |
| 177 | 33 | 12 | 17 | 17 | 21 | 186.66 | 6.90 |
| 178 | 12 | 14 | 23 | 28 | 23 | 202.21 | 7.42 |
| 179 | 30 | 33 | 18 | 11 | 8  | 164.87 | 8.76 |
| 180 | 11 | 12 | 11 | 34 | 32 | 196.84 | 6.41 |
| 181 | 27 | 10 | 22 | 22 | 19 | 193.40 | 7.28 |
| 182 | 12 | 33 | 18 | 26 | 11 | 194.15 | 8.86 |
| 183 | 19 | 33 | 18 | 9  | 21 | 180.00 | 8.00 |
| 184 | 21 | 19 | 24 | 30 | 6  | 195.05 | 8.73 |
| 185 | 23 | 25 | 23 | 24 | 5  | 191.24 | 9.02 |
| 186 | 12 | 22 | 18 | 23 | 25 | 196.89 | 7.33 |
| 187 | 28 | 18 | 20 | 22 | 12 | 189.09 | 7.98 |
| 188 | 22 | 28 | 31 | 5  | 14 | 190.74 | 8.67 |
| 189 | 13 | 17 | 27 | 18 | 25 | 207.04 | 7.53 |
| 190 | 22 | 22 | 5  | 35 | 16 | 177.39 | 7.44 |
| 191 | 35 | 24 | 22 | 12 | 7  | 172.87 | 8.49 |
| 192 | 12 | 19 | 20 | 22 | 27 | 205.19 | 7.19 |
| 193 | 23 | 24 | 15 | 28 | 10 | 186.74 | 8.28 |
| 194 | 28 | 34 | 13 | 14 | 11 | 163.50 | 8.51 |
| 195 | 12 | 31 | 16 | 31 | 10 | 192.28 | 8.77 |
| 196 | 16 | 28 | 22 | 24 | 10 | 196.38 | 8.80 |
| 197 | 11 | 35 | 24 | 15 | 15 | 198.47 | 8.74 |
| 198 | 24 | 6  | 17 | 35 | 18 | 192.60 | 7.14 |
| 199 | 7  | 35 | 6  | 27 | 25 | 183.47 | 7.49 |
| 200 | 10 | 23 | 30 | 5  | 32 | 211.70 | 7.39 |

| [111] | Cu% | Fe% | Ni% | Cr% | Co% | E (Gpa) | Ys (Gpa) |
|-------|-----|-----|-----|-----|-----|---------|----------|
| c     | 20  | 20  | 20  | 20  | 20  | 268.96  | 15.14    |
| 201   | 22  | 8   | 11  | 25  | 34  | 284.20  | 13.96    |
| 202   | 17  | 12  | 20  | 29  | 22  | 285.10  | 15.38    |
| 203   | 17  | 27  | 14  | 25  | 17  | 262.93  | 15.48    |
| 204   | 16  | 28  | 7   | 26  | 23  | 266.97  | 14.79    |
| 205   | 29  | 14  | 9   | 18  | 30  | 258.05  | 12.89    |
| 206   | 8   | 22  | 28  | 14  | 28  | 295.12  | 16.73    |
| 207   | 12  | 33  | 17  | 5   | 33  | 279.52  | 15.80    |
| 208   | 7   | 28  | 31  | 14  | 20  | 292.86  | 17.89    |
| 209   | 6   | 19  | 35  | 33  | 7   | 296.66  | 18.25    |
| 210   | 5   | 33  | 7   | 29  | 26  | 276.55  | 16.31    |
| 211   | 22  | 19  | 14  | 26  | 19  | 266.10  | 14.71    |
| 212   | 28  | 20  | 12  | 12  | 28  | 259.46  | 13.36    |
| 213   | 11  | 21  | 28  | 13  | 27  | 292.86  | 16.46    |
| 214   | 9   | 28  | 18  | 14  | 31  | 283.22  | 15.95    |
| 215   | 31  | 17  | 33  | 9   | 10  | 257.15  | 14.87    |
| 216   | 27  | 15  | 27  | 16  | 15  | 264.29  | 14.90    |
| 217   | 29  | 10  | 28  | 27  | 6   | 266.86  | 15.22    |
| 218   | 15  | 25  | 5   | 31  | 24  | 265.63  | 15.06    |
| 219   | 11  | 35  | 23  | 23  | 8   | 267.83  | 17.84    |
| 220   | 24  | 28  | 19  | 21  | 8   | 253.57  | 15.68    |
| 221   | 8   | 29  | 8   | 21  | 34  | 283.09  | 15.71    |
| 222   | 33  | 11  | 35  | 9   | 12  | 262.56  | 14.69    |
| 223   | 11  | 21  | 21  | 30  | 17  | 282.13  | 16.59    |
| 224   | 15  | 33  | 7   | 12  | 33  | 267.48  | 14.78    |
| 225   | 24  | 35  | 10  | 15  | 16  | 244.43  | 15.11    |
| 226   | 20  | 31  | 5   | 19  | 25  | 252.12  | 14.15    |
| 227   | 13  | 27  | 22  | 25  | 13  | 276.23  | 16.97    |
| 228   | 6   | 25  | 6   | 34  | 29  | 285.67  | 15.83    |
| 229   | 10  | 25  | 7   | 25  | 33  | 278.99  | 15.37    |
| 230   | 32  | 10  | 20  | 17  | 21  | 262.44  | 13.57    |
| 231   | 30  | 29  | 24  | 6   | 11  | 247.82  | 15.24    |
| 232   | 20  | 27  | 6   | 22  | 25  | 258.87  | 14.23    |
| 233   | 19  | 13  | 20  | 32  | 16  | 279.34  | 15.41    |
| 234   | 18  | 8   | 28  | 31  | 15  | 288.17  | 15.74    |
| 235   | 5   | 31  | 13  | 27  | 24  | 284.80  | 17.05    |
| 236   | 21  | 17  | 28  | 29  | 5   | 269.12  | 16.02    |
| 237   | 33  | 12  | 6   | 23  | 26  | 259.51  | 12.65    |
| 238   | 27  | 30  | 26  | 7   | 10  | 250.64  | 15.59    |
| 239   | 17  | 31  | 7   | 32  | 13  | 250.75  | 15.39    |
| 240   | 35  | 16  | 11  | 10  | 28  | 256.75  | 12.11    |
| 241   | 19  | 8   | 15  | 33  | 25  | 282.74  | 14.79    |
| 242   | 16  | 23  | 30  | 9   | 22  | 278.89  | 16.26    |
| 243   | 9   | 15  | 25  | 27  | 24  | 302.05  | 16.66    |
| 244   | 19  | 6   | 11  | 35  | 29  | 286.97  | 14.46    |
| 245   | 33  | 22  | 9   | 17  | 19  | 239.67  | 13.45    |
| 246   | 11  | 20  | 10  | 29  | 30  | 281.90  | 15.33    |
| 247   | 16  | 22  | 30  | 21  | 11  | 279.93  | 16.72    |
| 248   | 31  | 14  | 7   | 30  | 18  | 252.36  | 13.42    |
| 249   | 15  | 25  | 28  | 9   | 23  | 279.07  | 15.98    |
| 250   | 6   | 28  | 20  | 24  | 22  | 287.78  | 16.89    |
| 251   | 26  | 23  | 23  | 8   | 20  | 259.57  | 14.55    |
| 252   | 10  | 17  | 35  | 16  | 22  | 296.94  | 17.28    |

|     |    |    |    |    |    |        |       |
|-----|----|----|----|----|----|--------|-------|
| 253 | 19 | 5  | 16 | 26 | 34 | 296.23 | 14.23 |
| 254 | 15 | 32 | 21 | 9  | 23 | 267.19 | 15.84 |
| 255 | 27 | 34 | 18 | 14 | 7  | 240.58 | 15.68 |
| 256 | 13 | 24 | 12 | 29 | 22 | 271.99 | 15.41 |
| 257 | 35 | 33 | 9  | 7  | 16 | 224.41 | 13.50 |
| 258 | 31 | 8  | 20 | 35 | 6  | 260.01 | 14.48 |
| 259 | 17 | 23 | 19 | 30 | 11 | 271.22 | 16.13 |
| 260 | 14 | 26 | 34 | 11 | 15 | 279.99 | 17.29 |
| 261 | 33 | 35 | 15 | 6  | 11 | 230.12 | 14.37 |
| 262 | 12 | 29 | 12 | 28 | 19 | 269.91 | 15.84 |
| 263 | 19 | 13 | 9  | 33 | 26 | 277.10 | 14.47 |
| 264 | 14 | 31 | 13 | 34 | 8  | 259.52 | 16.64 |
| 265 | 15 | 10 | 28 | 34 | 13 | 286.44 | 16.24 |
| 266 | 29 | 20 | 11 | 10 | 30 | 257.90 | 13.33 |
| 267 | 24 | 11 | 10 | 23 | 32 | 276.58 | 13.17 |
| 268 | 13 | 12 | 32 | 10 | 33 | 303.84 | 16.11 |
| 269 | 7  | 24 | 30 | 16 | 23 | 299.41 | 17.50 |
| 270 | 23 | 26 | 21 | 23 | 7  | 253.93 | 15.72 |
| 271 | 33 | 6  | 12 | 30 | 19 | 264.35 | 13.37 |
| 272 | 16 | 33 | 30 | 11 | 10 | 264.34 | 16.99 |
| 273 | 9  | 9  | 31 | 31 | 20 | 303.97 | 17.07 |
| 274 | 8  | 23 | 30 | 13 | 26 | 299.65 | 17.16 |
| 275 | 19 | 19 | 11 | 20 | 31 | 274.52 | 14.12 |
| 276 | 15 | 27 | 20 | 20 | 18 | 269.54 | 16.23 |
| 277 | 29 | 9  | 6  | 23 | 33 | 263.43 | 12.91 |
| 278 | 13 | 34 | 5  | 24 | 24 | 261.03 | 15.44 |
| 279 | 14 | 30 | 17 | 19 | 20 | 270.49 | 15.68 |
| 280 | 14 | 28 | 30 | 7  | 21 | 277.47 | 16.55 |
| 281 | 23 | 26 | 12 | 34 | 5  | 253.94 | 15.18 |
| 282 | 31 | 16 | 13 | 17 | 23 | 255.31 | 12.94 |
| 283 | 11 | 31 | 29 | 23 | 6  | 275.00 | 18.03 |
| 284 | 8  | 22 | 28 | 12 | 30 | 296.52 | 16.74 |
| 285 | 17 | 19 | 30 | 15 | 19 | 280.90 | 16.35 |
| 286 | 20 | 11 | 28 | 17 | 24 | 286.09 | 14.65 |
| 287 | 34 | 15 | 13 | 28 | 10 | 249.88 | 13.78 |
| 288 | 7  | 14 | 35 | 31 | 13 | 300.98 | 17.59 |
| 289 | 32 | 16 | 23 | 7  | 22 | 261.06 | 13.68 |
| 290 | 15 | 24 | 23 | 18 | 20 | 278.78 | 16.26 |
| 291 | 8  | 29 | 14 | 29 | 20 | 276.48 | 16.74 |
| 292 | 13 | 28 | 10 | 26 | 23 | 269.62 | 15.69 |
| 293 | 22 | 33 | 27 | 12 | 6  | 253.06 | 16.94 |
| 294 | 26 | 10 | 27 | 20 | 17 | 273.34 | 14.61 |
| 295 | 9  | 33 | 5  | 23 | 30 | 274.90 | 15.46 |
| 296 | 21 | 15 | 23 | 6  | 35 | 286.50 | 14.43 |
| 297 | 28 | 8  | 28 | 18 | 18 | 271.34 | 14.58 |
| 298 | 22 | 23 | 18 | 16 | 21 | 268.91 | 14.70 |
| 299 | 27 | 18 | 22 | 27 | 6  | 257.24 | 14.80 |
| 300 | 5  | 29 | 27 | 6  | 33 | 301.27 | 17.52 |

| [210] | Cu% | Fe% | Ni% | Cr% | Co% | E (Gpa) | Ys (Gpa) |
|-------|-----|-----|-----|-----|-----|---------|----------|
| d     | 20  | 20  | 20  | 20  | 20  | 169.07  | 7.99     |
| 301   | 24  | 20  | 15  | 10  | 31  | 160.63  | 7.01     |
| 302   | 30  | 6   | 22  | 13  | 29  | 171.77  | 6.76     |
| 303   | 30  | 28  | 12  | 5   | 25  | 143.67  | 7.48     |
| 304   | 29  | 16  | 7   | 15  | 33  | 157.90  | 6.24     |
| 305   | 8   | 16  | 29  | 26  | 21  | 191.52  | 8.20     |
| 306   | 28  | 23  | 25  | 16  | 8   | 167.96  | 9.12     |
| 307   | 9   | 14  | 24  | 20  | 33  | 184.37  | 7.17     |
| 308   | 19  | 23  | 19  | 19  | 20  | 169.67  | 8.12     |
| 309   | 18  | 31  | 20  | 14  | 17  | 165.21  | 8.82     |
| 310   | 33  | 19  | 24  | 6   | 18  | 160.77  | 7.90     |
| 311   | 26  | 20  | 22  | 10  | 22  | 169.46  | 7.84     |
| 312   | 15  | 13  | 32  | 35  | 5   | 192.47  | 9.17     |
| 313   | 16  | 33  | 8   | 24  | 19  | 154.84  | 8.29     |
| 314   | 30  | 6   | 10  | 23  | 31  | 165.67  | 6.33     |
| 315   | 12  | 15  | 27  | 14  | 32  | 183.01  | 7.41     |
| 316   | 33  | 21  | 12  | 17  | 17  | 151.34  | 7.87     |
| 317   | 24  | 7   | 34  | 25  | 10  | 184.51  | 8.42     |
| 318   | 23  | 9   | 30  | 12  | 26  | 182.06  | 7.46     |
| 319   | 14  | 15  | 27  | 22  | 22  | 187.00  | 7.94     |
| 320   | 24  | 25  | 14  | 5   | 32  | 158.54  | 7.07     |
| 321   | 18  | 22  | 13  | 24  | 23  | 165.35  | 7.58     |
| 322   | 5   | 18  | 20  | 35  | 22  | 187.03  | 7.93     |
| 323   | 11  | 16  | 31  | 11  | 31  | 186.51  | 7.58     |
| 324   | 22  | 31  | 15  | 24  | 8   | 153.02  | 9.29     |
| 325   | 9   | 20  | 25  | 32  | 14  | 182.29  | 8.72     |
| 326   | 23  | 16  | 5   | 25  | 31  | 159.19  | 6.49     |
| 327   | 11  | 21  | 34  | 12  | 22  | 190.34  | 8.58     |
| 328   | 19  | 20  | 29  | 6   | 26  | 178.30  | 7.83     |
| 329   | 19  | 31  | 32  | 13  | 5   | 174.90  | 10.16    |
| 330   | 16  | 30  | 24  | 24  | 6   | 170.33  | 9.89     |
| 331   | 17  | 14  | 30  | 21  | 18  | 187.30  | 8.36     |
| 332   | 10  | 17  | 32  | 27  | 14  | 192.53  | 8.87     |
| 333   | 13  | 35  | 9   | 34  | 9   | 159.79  | 9.40     |
| 334   | 17  | 15  | 10  | 30  | 28  | 170.41  | 6.94     |
| 335   | 24  | 19  | 27  | 14  | 16  | 173.52  | 8.43     |
| 336   | 22  | 32  | 13  | 8   | 25  | 156.84  | 7.90     |
| 337   | 23  | 9   | 23  | 34  | 11  | 177.39  | 8.37     |
| 338   | 5   | 25  | 7   | 29  | 34  | 170.49  | 6.97     |
| 339   | 30  | 14  | 17  | 27  | 12  | 166.89  | 8.17     |
| 340   | 25  | 31  | 20  | 18  | 6   | 158.40  | 9.50     |
| 341   | 10  | 23  | 19  | 32  | 16  | 176.38  | 8.52     |
| 342   | 33  | 11  | 18  | 13  | 25  | 164.59  | 6.96     |
| 343   | 9   | 13  | 33  | 29  | 16  | 191.81  | 8.64     |
| 344   | 28  | 24  | 15  | 21  | 12  | 158.22  | 8.41     |
| 345   | 7   | 31  | 19  | 8   | 35  | 173.82  | 7.46     |
| 346   | 31  | 23  | 7   | 6   | 33  | 145.62  | 6.30     |
| 347   | 28  | 27  | 11  | 5   | 29  | 151.84  | 7.18     |
| 348   | 8   | 22  | 10  | 27  | 33  | 172.22  | 6.96     |
| 349   | 21  | 6   | 23  | 27  | 23  | 180.58  | 7.41     |

|     |    |    |    |    |    |        |      |
|-----|----|----|----|----|----|--------|------|
| 350 | 7  | 25 | 6  | 33 | 29 | 170.21 | 7.20 |
| 351 | 29 | 20 | 24 | 5  | 22 | 166.05 | 7.55 |
| 352 | 6  | 30 | 6  | 35 | 23 | 167.12 | 7.85 |
| 353 | 29 | 5  | 27 | 29 | 10 | 180.00 | 8.12 |
| 354 | 34 | 15 | 28 | 13 | 10 | 169.03 | 8.37 |
| 355 | 35 | 31 | 5  | 13 | 16 | 140.18 | 8.07 |
| 356 | 20 | 19 | 17 | 33 | 11 | 171.19 | 8.42 |
| 357 | 24 | 5  | 32 | 22 | 17 | 185.30 | 7.95 |
| 358 | 17 | 15 | 24 | 14 | 30 | 180.45 | 7.17 |
| 359 | 23 | 5  | 29 | 16 | 27 | 182.23 | 7.36 |
| 360 | 23 | 24 | 6  | 25 | 22 | 154.38 | 7.42 |
| 361 | 6  | 30 | 30 | 22 | 12 | 188.17 | 9.65 |
| 362 | 15 | 15 | 21 | 25 | 24 | 180.53 | 7.62 |
| 363 | 7  | 16 | 23 | 19 | 35 | 183.36 | 7.13 |
| 364 | 17 | 15 | 22 | 28 | 18 | 178.74 | 8.07 |
| 365 | 33 | 8  | 9  | 31 | 19 | 160.49 | 6.93 |
| 366 | 11 | 27 | 24 | 26 | 12 | 180.11 | 9.26 |
| 367 | 34 | 8  | 18 | 11 | 29 | 167.17 | 6.70 |
| 368 | 13 | 18 | 6  | 32 | 31 | 168.27 | 6.75 |
| 369 | 19 | 34 | 16 | 24 | 7  | 162.12 | 9.77 |
| 370 | 13 | 11 | 24 | 23 | 29 | 183.36 | 7.24 |
| 371 | 13 | 26 | 8  | 22 | 31 | 165.43 | 7.18 |
| 372 | 16 | 14 | 5  | 33 | 32 | 167.14 | 6.54 |
| 373 | 20 | 31 | 25 | 17 | 7  | 168.91 | 9.86 |
| 374 | 19 | 26 | 25 | 14 | 16 | 171.70 | 8.89 |
| 375 | 21 | 30 | 14 | 29 | 6  | 159.28 | 9.50 |
| 376 | 5  | 24 | 16 | 32 | 23 | 181.01 | 7.95 |
| 377 | 10 | 13 | 28 | 24 | 25 | 191.67 | 7.78 |
| 378 | 21 | 33 | 30 | 7  | 9  | 169.88 | 9.87 |
| 379 | 27 | 24 | 26 | 7  | 16 | 166.55 | 8.46 |
| 380 | 6  | 6  | 35 | 32 | 21 | 199.28 | 8.02 |
| 381 | 13 | 31 | 20 | 14 | 22 | 169.90 | 8.44 |
| 382 | 15 | 29 | 15 | 27 | 14 | 166.53 | 8.92 |
| 383 | 7  | 18 | 28 | 28 | 19 | 191.75 | 8.34 |
| 384 | 13 | 22 | 5  | 33 | 27 | 167.37 | 7.07 |
| 385 | 13 | 17 | 7  | 29 | 34 | 172.15 | 6.52 |
| 386 | 21 | 34 | 7  | 5  | 33 | 148.82 | 7.08 |
| 387 | 11 | 30 | 15 | 14 | 30 | 169.48 | 7.53 |
| 388 | 18 | 33 | 12 | 19 | 18 | 153.27 | 8.55 |
| 389 | 28 | 14 | 14 | 13 | 31 | 161.46 | 6.68 |
| 390 | 16 | 21 | 25 | 17 | 21 | 181.82 | 8.18 |
| 391 | 10 | 32 | 26 | 17 | 15 | 178.79 | 9.36 |
| 392 | 11 | 23 | 24 | 31 | 11 | 179.19 | 9.09 |
| 393 | 19 | 19 | 18 | 13 | 31 | 171.86 | 6.94 |
| 394 | 22 | 19 | 7  | 17 | 35 | 161.78 | 6.46 |
| 395 | 30 | 19 | 12 | 5  | 34 | 154.77 | 6.43 |
| 396 | 13 | 28 | 32 | 22 | 5  | 183.64 | 9.95 |
| 397 | 10 | 29 | 7  | 34 | 20 | 164.94 | 7.95 |
| 398 | 17 | 31 | 17 | 23 | 12 | 163.32 | 9.02 |
| 399 | 10 | 35 | 9  | 29 | 17 | 161.67 | 8.66 |
| 400 | 11 | 34 | 19 | 21 | 15 | 170.94 | 9.16 |

| [211] | Cu% | Fe% | Ni% | Cr% | Co% | E (Gpa) | Ys (Gpa) |
|-------|-----|-----|-----|-----|-----|---------|----------|
| e     | 20  | 20  | 20  | 20  | 20  | 229.89  | 12.65    |
| 401   | 33  | 12  | 14  | 32  | 9   | 218.46  | 11.84    |
| 402   | 24  | 22  | 12  | 12  | 30  | 221.86  | 11.39    |
| 403   | 26  | 22  | 5   | 31  | 16  | 214.10  | 11.98    |
| 404   | 23  | 25  | 25  | 10  | 17  | 226.87  | 12.87    |
| 405   | 30  | 28  | 15  | 18  | 9   | 204.96  | 12.28    |
| 406   | 8   | 15  | 25  | 17  | 35  | 260.61  | 13.24    |
| 407   | 20  | 10  | 8   | 31  | 31  | 230.04  | 11.48    |
| 408   | 22  | 16  | 12  | 15  | 35  | 227.02  | 11.34    |
| 409   | 35  | 33  | 12  | 8   | 12  | 191.41  | 12.10    |
| 410   | 15  | 23  | 5   | 25  | 32  | 229.77  | 11.95    |
| 411   | 26  | 8   | 17  | 21  | 28  | 235.06  | 11.40    |
| 412   | 33  | 14  | 11  | 35  | 7   | 215.04  | 11.64    |
| 413   | 21  | 19  | 13  | 30  | 17  | 232.35  | 12.21    |
| 414   | 31  | 20  | 11  | 21  | 17  | 212.68  | 11.56    |
| 415   | 28  | 7   | 24  | 23  | 18  | 235.74  | 11.86    |
| 416   | 34  | 7   | 20  | 28  | 11  | 221.92  | 11.75    |
| 417   | 28  | 9   | 12  | 34  | 17  | 227.74  | 11.94    |
| 418   | 11  | 30  | 25  | 23  | 11  | 238.92  | 14.24    |
| 419   | 5   | 12  | 29  | 25  | 29  | 266.74  | 13.55    |
| 420   | 27  | 30  | 13  | 18  | 12  | 203.52  | 12.54    |
| 421   | 19  | 31  | 27  | 6   | 17  | 228.59  | 13.30    |
| 422   | 6   | 33  | 8   | 27  | 26  | 236.46  | 12.88    |
| 423   | 26  | 23  | 12  | 6   | 33  | 221.34  | 10.55    |
| 424   | 21  | 26  | 16  | 19  | 18  | 222.87  | 12.47    |
| 425   | 16  | 28  | 30  | 11  | 15  | 235.74  | 13.83    |
| 426   | 21  | 25  | 29  | 15  | 10  | 230.37  | 13.64    |
| 427   | 14  | 29  | 23  | 6   | 28  | 238.46  | 12.96    |
| 428   | 18  | 21  | 31  | 12  | 18  | 237.16  | 13.21    |
| 429   | 21  | 15  | 24  | 13  | 27  | 235.87  | 12.08    |
| 430   | 7   | 32  | 9   | 22  | 30  | 238.33  | 12.61    |
| 431   | 21  | 29  | 28  | 16  | 6   | 223.28  | 13.52    |
| 432   | 26  | 15  | 15  | 24  | 20  | 226.81  | 11.71    |
| 433   | 12  | 22  | 32  | 22  | 12  | 246.98  | 14.63    |
| 434   | 21  | 22  | 26  | 11  | 20  | 233.35  | 12.76    |
| 435   | 6   | 12  | 28  | 23  | 31  | 263.87  | 13.89    |
| 436   | 15  | 11  | 32  | 31  | 11  | 247.87  | 13.94    |
| 437   | 5   | 25  | 15  | 20  | 35  | 248.60  | 13.06    |
| 438   | 13  | 26  | 12  | 23  | 26  | 231.56  | 12.85    |
| 439   | 5   | 32  | 25  | 12  | 26  | 244.59  | 13.96    |
| 440   | 17  | 11  | 17  | 33  | 22  | 246.90  | 12.67    |
| 441   | 15  | 23  | 15  | 34  | 13  | 230.27  | 13.50    |
| 442   | 34  | 24  | 24  | 8   | 10  | 208.77  | 11.84    |
| 443   | 13  | 23  | 26  | 6   | 32  | 249.34  | 12.70    |
| 444   | 8   | 34  | 17  | 8   | 33  | 238.03  | 13.18    |
| 445   | 19  | 32  | 17  | 22  | 10  | 222.67  | 13.41    |
| 446   | 34  | 19  | 21  | 18  | 8   | 214.33  | 12.28    |
| 447   | 31  | 19  | 19  | 6   | 25  | 216.31  | 11.31    |
| 448   | 13  | 16  | 35  | 30  | 6   | 248.90  | 14.67    |
| 449   | 19  | 25  | 26  | 15  | 15  | 231.33  | 13.48    |



|     |    |    |    |    |    |        |       |
|-----|----|----|----|----|----|--------|-------|
| 450 | 9  | 34 | 11 | 20 | 26 | 228.85 | 13.08 |
| 451 | 6  | 34 | 30 | 14 | 16 | 244.40 | 14.86 |
| 452 | 24 | 26 | 9  | 32 | 9  | 213.15 | 12.36 |
| 453 | 16 | 23 | 5  | 32 | 24 | 224.15 | 12.14 |
| 454 | 32 | 11 | 20 | 29 | 8  | 219.89 | 11.97 |
| 455 | 22 | 21 | 24 | 23 | 10 | 228.51 | 13.24 |
| 456 | 32 | 21 | 5  | 26 | 16 | 206.80 | 11.17 |
| 457 | 19 | 34 | 7  | 16 | 24 | 211.85 | 12.24 |
| 458 | 15 | 18 | 22 | 12 | 33 | 243.64 | 12.43 |
| 459 | 31 | 33 | 5  | 16 | 15 | 196.37 | 11.68 |
| 460 | 20 | 25 | 33 | 16 | 6  | 228.16 | 13.86 |
| 461 | 34 | 34 | 14 | 10 | 8  | 194.10 | 12.51 |
| 462 | 22 | 35 | 11 | 25 | 7  | 206.12 | 13.39 |
| 463 | 9  | 8  | 19 | 30 | 34 | 264.28 | 12.68 |
| 464 | 29 | 25 | 9  | 10 | 27 | 210.69 | 10.81 |
| 465 | 23 | 14 | 10 | 27 | 26 | 225.33 | 11.71 |
| 466 | 19 | 13 | 33 | 24 | 11 | 244.62 | 13.57 |
| 467 | 31 | 30 | 7  | 13 | 19 | 201.49 | 11.42 |
| 468 | 7  | 27 | 33 | 19 | 14 | 249.02 | 15.12 |
| 469 | 9  | 17 | 26 | 16 | 32 | 260.78 | 13.34 |
| 470 | 11 | 17 | 25 | 13 | 34 | 256.52 | 12.81 |
| 471 | 19 | 7  | 22 | 31 | 21 | 244.58 | 12.68 |
| 472 | 24 | 25 | 14 | 14 | 23 | 216.86 | 11.91 |
| 473 | 17 | 21 | 13 | 34 | 15 | 230.34 | 13.11 |
| 474 | 26 | 15 | 31 | 7  | 21 | 234.00 | 12.22 |
| 475 | 19 | 9  | 24 | 14 | 34 | 250.22 | 11.45 |
| 476 | 11 | 34 | 10 | 20 | 25 | 224.86 | 12.74 |
| 477 | 24 | 18 | 13 | 32 | 13 | 225.30 | 12.33 |
| 478 | 23 | 25 | 11 | 16 | 25 | 226.64 | 11.38 |
| 479 | 28 | 29 | 18 | 19 | 6  | 207.42 | 13.04 |
| 480 | 21 | 17 | 12 | 28 | 22 | 229.48 | 12.10 |
| 481 | 29 | 17 | 28 | 20 | 6  | 223.84 | 12.84 |
| 482 | 13 | 19 | 27 | 20 | 21 | 249.35 | 13.46 |
| 483 | 10 | 17 | 34 | 27 | 12 | 258.50 | 14.62 |
| 484 | 17 | 18 | 28 | 29 | 8  | 239.23 | 13.87 |
| 485 | 12 | 7  | 25 | 31 | 25 | 257.97 | 13.13 |
| 486 | 14 | 18 | 30 | 8  | 30 | 250.72 | 13.06 |
| 487 | 27 | 13 | 25 | 11 | 24 | 230.39 | 11.73 |
| 488 | 11 | 33 | 5  | 19 | 32 | 225.59 | 12.14 |
| 489 | 24 | 18 | 14 | 19 | 25 | 231.18 | 11.54 |
| 490 | 16 | 5  | 13 | 32 | 34 | 252.54 | 12.03 |
| 491 | 18 | 27 | 5  | 25 | 25 | 222.74 | 11.81 |
| 492 | 17 | 13 | 34 | 12 | 24 | 253.15 | 12.80 |
| 493 | 33 | 18 | 24 | 11 | 14 | 219.33 | 11.98 |
| 494 | 5  | 32 | 31 | 13 | 19 | 247.47 | 14.69 |
| 495 | 22 | 26 | 23 | 18 | 11 | 227.38 | 13.18 |
| 496 | 12 | 11 | 30 | 35 | 12 | 256.04 | 14.03 |
| 497 | 16 | 24 | 25 | 11 | 24 | 238.47 | 13.09 |
| 498 | 23 | 27 | 9  | 21 | 20 | 215.61 | 11.87 |
| 499 | 7  | 17 | 31 | 14 | 31 | 258.83 | 13.81 |
| 500 | 26 | 35 | 12 | 18 | 9  | 203.33 | 12.92 |

| [221] | Cu% | Fe% | Ni% | Cr% | Co% | E (Gpa) | Ys (Gpa) |
|-------|-----|-----|-----|-----|-----|---------|----------|
| f     | 20  | 20  | 20  | 20  | 20  | 242.83  | 11.92    |
| 501   | 28  | 19  | 18  | 8   | 27  | 233.76  | 10.84    |
| 502   | 29  | 20  | 8   | 18  | 25  | 220.45  | 10.42    |
| 503   | 22  | 8   | 12  | 35  | 23  | 245.26  | 11.40    |
| 504   | 11  | 35  | 35  | 13  | 6   | 244.83  | 14.80    |
| 505   | 33  | 21  | 6   | 12  | 28  | 217.82  | 10.30    |
| 506   | 19  | 34  | 11  | 12  | 24  | 229.07  | 11.94    |
| 507   | 16  | 22  | 33  | 10  | 19  | 255.34  | 12.85    |
| 508   | 26  | 25  | 22  | 21  | 6   | 222.03  | 12.68    |
| 509   | 32  | 15  | 21  | 27  | 5   | 227.47  | 12.03    |
| 510   | 32  | 20  | 5   | 9   | 34  | 219.49  | 9.59     |
| 511   | 31  | 8   | 9   | 19  | 33  | 236.74  | 10.04    |
| 512   | 24  | 28  | 10  | 8   | 30  | 230.99  | 10.52    |
| 513   | 23  | 8   | 32  | 27  | 10  | 255.48  | 12.67    |
| 514   | 16  | 15  | 9   | 34  | 26  | 246.87  | 11.61    |
| 515   | 17  | 27  | 15  | 30  | 11  | 233.62  | 12.76    |
| 516   | 26  | 17  | 9   | 34  | 14  | 229.07  | 11.26    |
| 517   | 23  | 28  | 25  | 8   | 16  | 234.74  | 12.54    |
| 518   | 8   | 27  | 20  | 16  | 29  | 260.78  | 12.69    |
| 519   | 19  | 5   | 21  | 21  | 34  | 260.53  | 11.44    |
| 520   | 11  | 31  | 27  | 18  | 13  | 250.00  | 13.86    |
| 521   | 20  | 7   | 20  | 33  | 20  | 258.40  | 11.97    |
| 522   | 30  | 15  | 26  | 22  | 7   | 232.62  | 12.29    |
| 523   | 20  | 22  | 18  | 9   | 31  | 244.55  | 11.30    |
| 524   | 31  | 11  | 16  | 18  | 24  | 232.62  | 10.74    |
| 525   | 13  | 28  | 23  | 20  | 16  | 249.89  | 13.19    |
| 526   | 16  | 21  | 18  | 34  | 11  | 247.22  | 12.93    |
| 527   | 26  | 21  | 28  | 8   | 17  | 241.90  | 11.90    |
| 528   | 18  | 25  | 26  | 12  | 19  | 248.50  | 12.50    |
| 529   | 24  | 9   | 16  | 23  | 28  | 248.80  | 10.95    |
| 530   | 18  | 27  | 18  | 11  | 26  | 241.74  | 11.98    |
| 531   | 18  | 25  | 10  | 13  | 34  | 239.15  | 10.86    |
| 532   | 35  | 33  | 20  | 6   | 6   | 204.95  | 12.40    |
| 533   | 10  | 13  | 17  | 33  | 27  | 263.51  | 12.01    |
| 534   | 26  | 10  | 27  | 17  | 20  | 244.89  | 11.60    |
| 535   | 5   | 33  | 17  | 25  | 20  | 250.99  | 13.29    |
| 536   | 28  | 28  | 21  | 6   | 17  | 224.15  | 11.43    |
| 537   | 11  | 9   | 35  | 20  | 25  | 278.62  | 12.59    |
| 538   | 25  | 32  | 23  | 11  | 9   | 213.97  | 12.86    |
| 539   | 18  | 12  | 28  | 22  | 20  | 256.74  | 12.06    |
| 540   | 19  | 25  | 21  | 11  | 24  | 241.16  | 12.20    |
| 541   | 35  | 11  | 17  | 24  | 13  | 227.07  | 11.02    |
| 542   | 28  | 13  | 24  | 20  | 15  | 241.47  | 11.59    |
| 543   | 30  | 18  | 14  | 24  | 14  | 226.68  | 11.68    |
| 544   | 18  | 7   | 8   | 33  | 34  | 252.55  | 10.92    |
| 545   | 25  | 12  | 23  | 28  | 12  | 242.03  | 11.99    |
| 546   | 13  | 18  | 5   | 33  | 31  | 247.98  | 11.39    |
| 547   | 13  | 21  | 16  | 21  | 29  | 251.97  | 11.62    |
| 548   | 19  | 26  | 8   | 29  | 18  | 230.02  | 11.70    |
| 549   | 29  | 19  | 6   | 32  | 14  | 221.58  | 11.32    |

|     |    |    |    |    |    |        |       |
|-----|----|----|----|----|----|--------|-------|
| 550 | 9  | 32 | 13 | 19 | 27 | 243.77 | 12.59 |
| 551 | 25 | 27 | 24 | 17 | 7  | 227.82 | 12.86 |
| 552 | 18 | 21 | 24 | 21 | 16 | 247.56 | 12.42 |
| 553 | 10 | 32 | 11 | 21 | 26 | 245.61 | 12.14 |
| 554 | 32 | 27 | 10 | 17 | 14 | 212.88 | 11.26 |
| 555 | 11 | 34 | 25 | 21 | 9  | 243.92 | 13.73 |
| 556 | 35 | 14 | 22 | 5  | 24 | 231.94 | 10.62 |
| 557 | 21 | 29 | 20 | 8  | 22 | 232.84 | 12.14 |
| 558 | 17 | 35 | 24 | 18 | 6  | 231.36 | 13.83 |
| 559 | 29 | 15 | 34 | 17 | 5  | 240.78 | 12.60 |
| 560 | 6  | 5  | 31 | 26 | 32 | 283.45 | 12.97 |
| 561 | 15 | 19 | 22 | 30 | 14 | 248.74 | 12.81 |
| 562 | 25 | 20 | 16 | 26 | 13 | 233.04 | 11.75 |
| 563 | 23 | 11 | 35 | 17 | 14 | 251.43 | 12.53 |
| 564 | 32 | 15 | 19 | 21 | 13 | 231.69 | 11.50 |
| 565 | 30 | 20 | 18 | 8  | 24 | 228.58 | 10.70 |
| 566 | 17 | 14 | 17 | 25 | 27 | 254.46 | 11.78 |
| 567 | 8  | 29 | 11 | 35 | 17 | 247.46 | 12.79 |
| 568 | 6  | 35 | 7  | 21 | 31 | 245.25 | 12.57 |
| 569 | 33 | 20 | 14 | 21 | 12 | 220.35 | 11.25 |
| 570 | 18 | 33 | 16 | 20 | 13 | 229.53 | 12.48 |
| 571 | 34 | 5  | 24 | 28 | 9  | 235.89 | 11.62 |
| 572 | 28 | 9  | 24 | 8  | 31 | 245.99 | 10.92 |
| 573 | 10 | 35 | 16 | 8  | 31 | 241.57 | 12.37 |
| 574 | 24 | 11 | 28 | 26 | 11 | 244.88 | 12.49 |
| 575 | 35 | 29 | 16 | 15 | 5  | 207.66 | 12.08 |
| 576 | 29 | 30 | 25 | 5  | 11 | 219.02 | 12.44 |
| 577 | 10 | 10 | 22 | 23 | 35 | 273.78 | 12.02 |
| 578 | 34 | 17 | 15 | 7  | 27 | 228.02 | 10.34 |
| 579 | 6  | 11 | 35 | 24 | 24 | 277.37 | 13.64 |
| 580 | 16 | 13 | 33 | 8  | 30 | 266.94 | 12.19 |
| 581 | 15 | 18 | 25 | 28 | 14 | 253.11 | 12.95 |
| 582 | 24 | 20 | 28 | 20 | 8  | 240.14 | 12.74 |
| 583 | 22 | 13 | 33 | 25 | 7  | 248.35 | 13.11 |
| 584 | 25 | 30 | 7  | 11 | 27 | 220.26 | 10.60 |
| 585 | 15 | 24 | 27 | 26 | 8  | 246.13 | 13.80 |
| 586 | 30 | 19 | 14 | 13 | 24 | 228.22 | 10.63 |
| 587 | 20 | 34 | 30 | 11 | 5  | 231.47 | 14.04 |
| 588 | 25 | 8  | 11 | 27 | 29 | 240.49 | 10.95 |
| 589 | 20 | 21 | 20 | 24 | 15 | 238.82 | 12.46 |
| 590 | 29 | 18 | 20 | 11 | 22 | 232.78 | 11.14 |
| 591 | 30 | 16 | 19 | 9  | 26 | 235.49 | 10.54 |
| 592 | 24 | 6  | 15 | 30 | 25 | 245.69 | 11.15 |
| 593 | 33 | 10 | 17 | 11 | 29 | 236.68 | 10.13 |
| 594 | 34 | 31 | 5  | 21 | 9  | 199.60 | 11.61 |
| 595 | 7  | 27 | 7  | 26 | 33 | 250.06 | 11.71 |
| 596 | 5  | 29 | 13 | 19 | 34 | 255.99 | 12.25 |
| 597 | 8  | 17 | 32 | 12 | 31 | 275.89 | 12.64 |
| 598 | 21 | 7  | 7  | 32 | 33 | 247.50 | 10.72 |
| 599 | 28 | 26 | 6  | 25 | 15 | 214.96 | 11.30 |
| 600 | 32 | 6  | 27 | 18 | 17 | 245.05 | 11.32 |

| [321] | Cu% | Fe% | Ni% | Cr% | Co% | E (Gpa) | Ys (Gpa) |
|-------|-----|-----|-----|-----|-----|---------|----------|
| g     | 20  | 20  | 20  | 20  | 20  | 232.46  | 11.50    |
| 601   | 16  | 11  | 32  | 6   | 35  | 254.67  | 11.58    |
| 602   | 21  | 7   | 22  | 34  | 16  | 243.27  | 11.35    |
| 603   | 6   | 26  | 12  | 25  | 31  | 245.33  | 11.92    |
| 604   | 17  | 11  | 11  | 34  | 27  | 243.58  | 11.23    |
| 605   | 30  | 9   | 9   | 26  | 26  | 225.32  | 10.15    |
| 606   | 22  | 20  | 19  | 21  | 18  | 226.09  | 11.56    |
| 607   | 20  | 26  | 10  | 16  | 28  | 225.24  | 10.68    |
| 608   | 9   | 24  | 27  | 17  | 23  | 251.65  | 12.70    |
| 609   | 6   | 7   | 32  | 22  | 33  | 271.77  | 12.31    |
| 610   | 18  | 32  | 8   | 13  | 29  | 216.43  | 10.66    |
| 611   | 28  | 19  | 7   | 16  | 30  | 216.82  | 9.94     |
| 612   | 5   | 18  | 22  | 21  | 34  | 260.70  | 11.71    |
| 613   | 35  | 14  | 23  | 21  | 7   | 219.06  | 11.12    |
| 614   | 13  | 22  | 13  | 20  | 32  | 242.71  | 10.91    |
| 615   | 23  | 15  | 8   | 29  | 25  | 224.32  | 10.62    |
| 616   | 9   | 18  | 23  | 29  | 21  | 253.17  | 12.67    |
| 617   | 22  | 22  | 8   | 31  | 17  | 217.95  | 11.13    |
| 618   | 31  | 15  | 30  | 15  | 9   | 232.25  | 11.72    |
| 619   | 5   | 32  | 6   | 31  | 26  | 234.48  | 11.59    |
| 620   | 8   | 34  | 11  | 13  | 34  | 233.08  | 11.68    |
| 621   | 19  | 29  | 13  | 19  | 20  | 222.10  | 11.87    |
| 622   | 20  | 31  | 19  | 23  | 7   | 217.44  | 12.97    |
| 623   | 24  | 15  | 24  | 16  | 21  | 232.00  | 11.63    |
| 624   | 13  | 26  | 13  | 16  | 32  | 231.07  | 11.21    |
| 625   | 7   | 13  | 12  | 33  | 35  | 255.31  | 11.61    |
| 626   | 20  | 24  | 29  | 22  | 5   | 232.25  | 13.07    |
| 627   | 21  | 6   | 25  | 35  | 13  | 245.15  | 12.02    |
| 628   | 21  | 23  | 9   | 28  | 19  | 219.72  | 11.31    |
| 629   | 14  | 30  | 7   | 34  | 15  | 221.24  | 11.99    |
| 630   | 20  | 17  | 12  | 34  | 17  | 227.31  | 11.50    |
| 631   | 35  | 16  | 24  | 9   | 16  | 215.03  | 10.53    |
| 632   | 31  | 14  | 11  | 24  | 20  | 218.86  | 10.64    |
| 633   | 14  | 6   | 32  | 32  | 16  | 254.17  | 12.76    |
| 634   | 32  | 11  | 8   | 20  | 29  | 223.78  | 9.49     |
| 635   | 6   | 29  | 25  | 33  | 7   | 247.02  | 13.85    |
| 636   | 35  | 16  | 25  | 7   | 17  | 222.97  | 10.65    |
| 637   | 34  | 16  | 19  | 11  | 20  | 218.24  | 10.51    |
| 638   | 21  | 14  | 17  | 30  | 18  | 235.77  | 11.71    |
| 639   | 18  | 30  | 12  | 29  | 11  | 217.75  | 12.42    |
| 640   | 14  | 9   | 25  | 28  | 24  | 251.56  | 12.06    |
| 641   | 23  | 14  | 35  | 13  | 15  | 242.80  | 11.92    |
| 642   | 22  | 17  | 28  | 16  | 17  | 233.22  | 11.74    |
| 643   | 27  | 6   | 25  | 15  | 27  | 237.71  | 10.83    |
| 644   | 21  | 25  | 23  | 15  | 16  | 227.87  | 11.71    |
| 645   | 30  | 18  | 8   | 24  | 20  | 216.89  | 10.43    |
| 646   | 20  | 29  | 17  | 7   | 27  | 228.04  | 11.14    |
| 647   | 24  | 17  | 15  | 27  | 17  | 229.09  | 11.45    |
| 648   | 31  | 16  | 14  | 15  | 24  | 216.77  | 10.28    |
| 649   | 26  | 13  | 19  | 9   | 33  | 234.50  | 10.26    |

|     |    |    |    |    |    |        |       |
|-----|----|----|----|----|----|--------|-------|
| 650 | 20 | 10 | 27 | 35 | 8  | 243.67 | 12.58 |
| 651 | 19 | 34 | 26 | 11 | 10 | 220.13 | 12.85 |
| 652 | 13 | 25 | 19 | 21 | 22 | 239.67 | 12.19 |
| 653 | 9  | 33 | 21 | 21 | 16 | 231.03 | 13.35 |
| 654 | 30 | 29 | 18 | 13 | 10 | 208.68 | 12.09 |
| 655 | 20 | 18 | 31 | 15 | 16 | 240.86 | 11.96 |
| 656 | 31 | 26 | 7  | 23 | 13 | 202.14 | 10.58 |
| 657 | 13 | 14 | 27 | 14 | 32 | 252.67 | 12.06 |
| 658 | 26 | 13 | 33 | 12 | 16 | 236.96 | 11.70 |
| 659 | 18 | 31 | 10 | 24 | 17 | 217.86 | 11.82 |
| 660 | 33 | 11 | 21 | 26 | 9  | 221.50 | 11.18 |
| 661 | 25 | 20 | 6  | 31 | 18 | 216.72 | 10.89 |
| 662 | 24 | 8  | 30 | 33 | 5  | 239.32 | 12.26 |
| 663 | 16 | 35 | 30 | 13 | 6  | 231.29 | 13.98 |
| 664 | 24 | 32 | 24 | 5  | 15 | 216.51 | 12.18 |
| 665 | 7  | 26 | 26 | 18 | 23 | 252.58 | 12.85 |
| 666 | 27 | 12 | 18 | 25 | 18 | 229.62 | 10.95 |
| 667 | 31 | 11 | 17 | 18 | 23 | 221.90 | 10.23 |
| 668 | 10 | 18 | 27 | 31 | 14 | 250.57 | 12.95 |
| 669 | 13 | 17 | 33 | 13 | 24 | 252.12 | 12.64 |
| 670 | 15 | 31 | 5  | 22 | 27 | 223.71 | 11.10 |
| 671 | 13 | 11 | 26 | 29 | 21 | 252.61 | 12.37 |
| 672 | 32 | 5  | 8  | 29 | 26 | 224.80 | 10.10 |
| 673 | 10 | 22 | 21 | 20 | 27 | 247.59 | 12.25 |
| 674 | 29 | 16 | 17 | 7  | 31 | 223.24 | 10.02 |
| 675 | 34 | 6  | 12 | 13 | 35 | 226.82 | 9.35  |
| 676 | 15 | 24 | 25 | 25 | 11 | 239.45 | 12.52 |
| 677 | 9  | 33 | 21 | 14 | 23 | 237.14 | 12.47 |
| 678 | 16 | 33 | 19 | 15 | 17 | 218.28 | 12.46 |
| 679 | 32 | 21 | 6  | 29 | 12 | 205.63 | 10.79 |
| 680 | 12 | 15 | 16 | 22 | 35 | 249.99 | 10.89 |
| 681 | 22 | 24 | 21 | 13 | 20 | 224.16 | 11.66 |
| 682 | 27 | 14 | 30 | 19 | 10 | 229.13 | 12.13 |
| 683 | 24 | 5  | 17 | 23 | 31 | 236.13 | 10.78 |
| 684 | 17 | 12 | 23 | 22 | 26 | 248.19 | 11.54 |
| 685 | 12 | 34 | 5  | 21 | 28 | 226.60 | 10.97 |
| 686 | 8  | 35 | 5  | 21 | 31 | 235.96 | 11.57 |
| 687 | 7  | 26 | 26 | 9  | 32 | 255.89 | 12.57 |
| 688 | 13 | 18 | 32 | 8  | 29 | 251.72 | 12.17 |
| 689 | 22 | 22 | 21 | 27 | 8  | 227.87 | 12.21 |
| 690 | 13 | 16 | 19 | 34 | 18 | 238.65 | 12.22 |
| 691 | 29 | 13 | 32 | 16 | 10 | 230.57 | 11.69 |
| 692 | 15 | 31 | 22 | 23 | 9  | 225.70 | 13.42 |
| 693 | 32 | 13 | 25 | 7  | 23 | 228.52 | 10.60 |
| 694 | 21 | 32 | 11 | 15 | 21 | 212.44 | 11.58 |
| 695 | 18 | 32 | 21 | 11 | 18 | 224.78 | 12.29 |
| 696 | 29 | 5  | 21 | 14 | 31 | 236.02 | 10.10 |
| 697 | 17 | 32 | 23 | 8  | 20 | 225.23 | 12.03 |
| 698 | 14 | 27 | 19 | 6  | 34 | 238.35 | 11.07 |
| 699 | 28 | 16 | 8  | 13 | 35 | 220.43 | 9.64  |
| 700 | 32 | 13 | 34 | 8  | 13 | 229.07 | 11.51 |

| [821] | Cu% | Fe% | Ni% | Cr% | Co% | E (Gpa) | Ys (Gpa) |
|-------|-----|-----|-----|-----|-----|---------|----------|
| h     | 20  | 20  | 20  | 20  | 20  | 140.76  | 9.50     |
| 701   | 18  | 5   | 22  | 34  | 21  | 151.29  | 8.78     |
| 702   | 30  | 14  | 10  | 11  | 35  | 134.91  | 7.24     |
| 703   | 16  | 27  | 33  | 7   | 17  | 153.21  | 11.09    |
| 704   | 23  | 31  | 6   | 11  | 29  | 123.30  | 8.54     |
| 705   | 5   | 35  | 21  | 26  | 13  | 152.59  | 11.49    |
| 706   | 13  | 16  | 8   | 30  | 33  | 142.05  | 8.03     |
| 707   | 35  | 10  | 28  | 14  | 13  | 145.02  | 9.21     |
| 708   | 22  | 35  | 5   | 25  | 13  | 122.24  | 10.73    |
| 709   | 6   | 27  | 19  | 34  | 14  | 152.79  | 10.66    |
| 710   | 22  | 28  | 10  | 18  | 22  | 130.31  | 9.30     |
| 711   | 19  | 35  | 15  | 11  | 20  | 130.56  | 10.23    |
| 712   | 16  | 17  | 7   | 33  | 27  | 134.68  | 8.31     |
| 713   | 18  | 31  | 11  | 11  | 29  | 131.51  | 8.75     |
| 714   | 28  | 33  | 13  | 18  | 8   | 124.82  | 10.74    |
| 715   | 7   | 32  | 19  | 16  | 26  | 150.34  | 9.67     |
| 716   | 27  | 18  | 29  | 19  | 7   | 148.14  | 10.72    |
| 717   | 34  | 10  | 9   | 25  | 22  | 135.15  | 8.14     |
| 718   | 29  | 30  | 19  | 10  | 12  | 128.96  | 10.58    |
| 719   | 27  | 22  | 8   | 15  | 28  | 130.75  | 7.53     |
| 720   | 27  | 17  | 32  | 7   | 17  | 149.46  | 9.83     |
| 721   | 34  | 29  | 20  | 11  | 6   | 126.57  | 10.58    |
| 722   | 10  | 33  | 20  | 26  | 11  | 147.33  | 11.46    |
| 723   | 14  | 35  | 18  | 12  | 21  | 141.47  | 10.54    |
| 724   | 24  | 13  | 35  | 13  | 15  | 153.63  | 10.04    |
| 725   | 8   | 33  | 5   | 21  | 33  | 136.15  | 8.73     |
| 726   | 12  | 14  | 28  | 35  | 11  | 157.73  | 10.39    |
| 727   | 27  | 10  | 21  | 10  | 32  | 145.07  | 8.02     |
| 728   | 21  | 19  | 15  | 32  | 13  | 144.29  | 9.78     |
| 729   | 24  | 6   | 35  | 12  | 23  | 154.55  | 9.13     |
| 730   | 35  | 17  | 8   | 11  | 29  | 128.40  | 7.60     |
| 731   | 12  | 11  | 20  | 22  | 35  | 155.56  | 8.21     |
| 732   | 5   | 35  | 11  | 29  | 20  | 145.49  | 10.31    |
| 733   | 9   | 14  | 16  | 29  | 32  | 151.05  | 8.36     |
| 734   | 26  | 22  | 28  | 18  | 6   | 146.00  | 10.93    |
| 735   | 21  | 16  | 24  | 9   | 30  | 147.27  | 8.46     |
| 736   | 27  | 8   | 30  | 27  | 8   | 150.05  | 10.11    |
| 737   | 10  | 17  | 30  | 23  | 20  | 160.35  | 9.90     |
| 738   | 8   | 16  | 19  | 32  | 25  | 151.12  | 8.90     |
| 739   | 14  | 27  | 11  | 18  | 30  | 138.21  | 8.68     |
| 740   | 7   | 29  | 31  | 14  | 19  | 161.70  | 10.87    |
| 741   | 30  | 32  | 6   | 7   | 25  | 114.72  | 8.91     |
| 742   | 13  | 19  | 9   | 35  | 24  | 142.46  | 8.89     |
| 743   | 18  | 20  | 7   | 31  | 24  | 138.55  | 8.78     |
| 744   | 28  | 12  | 21  | 17  | 22  | 144.89  | 8.65     |
| 745   | 15  | 7   | 29  | 19  | 30  | 156.14  | 8.67     |
| 746   | 14  | 30  | 10  | 28  | 18  | 135.39  | 9.96     |
| 747   | 31  | 7   | 19  | 34  | 9   | 143.14  | 9.48     |
| 748   | 21  | 11  | 11  | 34  | 23  | 142.97  | 8.42     |
| 749   | 15  | 29  | 11  | 21  | 24  | 140.15  | 9.44     |

|     |    |    |    |    |    |        |       |
|-----|----|----|----|----|----|--------|-------|
| 750 | 5  | 35 | 21 | 11 | 28 | 148.00 | 10.01 |
| 751 | 23 | 27 | 28 | 10 | 12 | 146.31 | 10.43 |
| 752 | 5  | 33 | 19 | 34 | 9  | 155.96 | 11.49 |
| 753 | 34 | 12 | 21 | 5  | 28 | 140.02 | 7.97  |
| 754 | 12 | 10 | 26 | 31 | 21 | 153.61 | 9.27  |
| 755 | 22 | 20 | 19 | 8  | 31 | 144.59 | 8.31  |
| 756 | 15 | 15 | 32 | 31 | 7  | 161.66 | 10.96 |
| 757 | 26 | 30 | 9  | 25 | 10 | 126.08 | 10.55 |
| 758 | 31 | 11 | 29 | 20 | 9  | 147.32 | 10.00 |
| 759 | 19 | 27 | 8  | 32 | 14 | 135.36 | 10.08 |
| 760 | 21 | 21 | 26 | 8  | 24 | 146.20 | 9.44  |
| 761 | 5  | 34 | 5  | 31 | 25 | 141.06 | 9.53  |
| 762 | 21 | 10 | 23 | 11 | 35 | 147.96 | 8.01  |
| 763 | 7  | 10 | 31 | 28 | 24 | 164.56 | 9.36  |
| 764 | 32 | 31 | 9  | 19 | 9  | 120.18 | 10.36 |
| 765 | 21 | 30 | 25 | 17 | 7  | 147.04 | 11.56 |
| 766 | 13 | 26 | 29 | 5  | 27 | 151.92 | 9.69  |
| 767 | 31 | 23 | 19 | 20 | 7  | 135.76 | 10.31 |
| 768 | 11 | 23 | 14 | 25 | 27 | 146.30 | 8.94  |
| 769 | 21 | 11 | 30 | 5  | 33 | 154.07 | 8.41  |
| 770 | 27 | 29 | 13 | 21 | 10 | 131.02 | 10.44 |
| 771 | 26 | 11 | 34 | 12 | 17 | 156.20 | 9.64  |
| 772 | 21 | 13 | 30 | 17 | 19 | 152.96 | 9.49  |
| 773 | 28 | 6  | 13 | 35 | 18 | 140.31 | 8.24  |
| 774 | 11 | 33 | 13 | 9  | 34 | 140.04 | 8.80  |
| 775 | 19 | 5  | 30 | 34 | 12 | 156.07 | 9.76  |
| 776 | 31 | 16 | 15 | 22 | 16 | 138.36 | 9.20  |
| 777 | 5  | 33 | 21 | 23 | 18 | 152.12 | 11.09 |
| 778 | 19 | 16 | 18 | 15 | 32 | 141.42 | 8.14  |
| 779 | 25 | 23 | 10 | 22 | 20 | 133.92 | 9.11  |
| 780 | 7  | 32 | 32 | 10 | 19 | 156.22 | 11.32 |
| 781 | 5  | 31 | 27 | 16 | 21 | 158.84 | 10.59 |
| 782 | 5  | 31 | 26 | 15 | 23 | 158.96 | 10.46 |
| 783 | 26 | 23 | 34 | 8  | 9  | 148.71 | 11.12 |
| 784 | 19 | 31 | 17 | 27 | 6  | 138.42 | 11.55 |
| 785 | 21 | 11 | 6  | 30 | 32 | 140.01 | 7.74  |
| 786 | 14 | 29 | 19 | 26 | 12 | 146.73 | 11.17 |
| 787 | 11 | 34 | 23 | 19 | 13 | 149.12 | 11.07 |
| 788 | 8  | 16 | 25 | 34 | 17 | 159.04 | 9.93  |
| 789 | 33 | 17 | 5  | 10 | 35 | 122.68 | 7.12  |
| 790 | 24 | 23 | 17 | 14 | 22 | 138.82 | 9.00  |
| 791 | 16 | 11 | 23 | 33 | 17 | 152.81 | 9.59  |
| 792 | 34 | 25 | 25 | 5  | 11 | 130.81 | 10.35 |
| 793 | 30 | 7  | 29 | 19 | 15 | 149.14 | 9.27  |
| 794 | 13 | 27 | 15 | 11 | 34 | 137.13 | 8.60  |
| 795 | 27 | 8  | 17 | 31 | 17 | 143.32 | 8.96  |
| 796 | 32 | 27 | 5  | 28 | 8  | 126.68 | 10.12 |
| 797 | 21 | 11 | 18 | 20 | 30 | 148.95 | 8.21  |
| 798 | 22 | 24 | 12 | 30 | 12 | 135.69 | 10.42 |
| 799 | 7  | 33 | 10 | 18 | 32 | 141.83 | 8.68  |
| 800 | 21 | 8  | 11 | 27 | 33 | 141.52 | 7.59  |

| [876] | Cu% | Fe% | Ni% | Cr% | Co% | E (Gpa) | Ys (Gpa) |
|-------|-----|-----|-----|-----|-----|---------|----------|
| i     | 20  | 20  | 20  | 20  | 20  | 263.35  | 14.44    |
| 801   | 20  | 18  | 32  | 15  | 15  | 273.04  | 15.30    |
| 802   | 11  | 18  | 34  | 17  | 20  | 287.31  | 16.03    |
| 803   | 31  | 7   | 21  | 6   | 35  | 274.26  | 12.48    |
| 804   | 20  | 14  | 27  | 7   | 32  | 284.07  | 13.73    |
| 805   | 21  | 17  | 9   | 25  | 28  | 268.91  | 13.27    |
| 806   | 17  | 35  | 19  | 22  | 7   | 251.50  | 16.18    |
| 807   | 7   | 32  | 29  | 15  | 17  | 283.52  | 16.34    |
| 808   | 23  | 28  | 33  | 6   | 10  | 259.34  | 15.34    |
| 809   | 13  | 31  | 24  | 10  | 22  | 273.16  | 15.72    |
| 810   | 15  | 15  | 27  | 18  | 25  | 283.37  | 14.94    |
| 811   | 30  | 31  | 6   | 5   | 28  | 236.61  | 12.54    |
| 812   | 25  | 31  | 6   | 21  | 17  | 239.19  | 13.92    |
| 813   | 22  | 27  | 13  | 16  | 22  | 250.66  | 14.11    |
| 814   | 31  | 5   | 28  | 19  | 17  | 270.23  | 13.86    |
| 815   | 31  | 13  | 33  | 8   | 15  | 262.82  | 14.05    |
| 816   | 23  | 29  | 9   | 32  | 7   | 245.11  | 14.64    |
| 817   | 21  | 10  | 18  | 28  | 23  | 281.10  | 14.14    |
| 818   | 7   | 13  | 20  | 29  | 31  | 299.76  | 15.49    |
| 819   | 14  | 33  | 12  | 6   | 35  | 265.83  | 14.60    |
| 820   | 35  | 6   | 5   | 20  | 34  | 257.17  | 11.46    |
| 821   | 16  | 9   | 25  | 34  | 16  | 282.96  | 15.31    |
| 822   | 22  | 20  | 5   | 28  | 25  | 260.15  | 13.49    |
| 823   | 19  | 23  | 30  | 23  | 5   | 271.53  | 16.28    |
| 824   | 23  | 21  | 17  | 16  | 23  | 259.01  | 13.91    |
| 825   | 18  | 18  | 25  | 34  | 5   | 268.28  | 15.96    |
| 826   | 30  | 14  | 16  | 29  | 11  | 250.90  | 13.53    |
| 827   | 27  | 19  | 23  | 6   | 25  | 257.87  | 13.64    |
| 828   | 20  | 34  | 20  | 5   | 21  | 253.14  | 14.56    |
| 829   | 6   | 22  | 17  | 21  | 34  | 292.15  | 15.43    |
| 830   | 18  | 26  | 8   | 27  | 21  | 257.53  | 14.44    |
| 831   | 10  | 34  | 35  | 15  | 6   | 272.70  | 17.97    |
| 832   | 31  | 16  | 21  | 11  | 21  | 252.08  | 13.15    |
| 833   | 24  | 28  | 20  | 14  | 14  | 248.34  | 14.22    |
| 834   | 27  | 17  | 16  | 32  | 8   | 250.78  | 14.26    |
| 835   | 6   | 35  | 19  | 33  | 7   | 269.31  | 17.87    |
| 836   | 5   | 27  | 26  | 16  | 26  | 292.29  | 16.85    |
| 837   | 24  | 13  | 20  | 22  | 21  | 264.50  | 13.99    |
| 838   | 28  | 34  | 22  | 7   | 9   | 239.06  | 15.10    |
| 839   | 33  | 11  | 15  | 13  | 28  | 256.87  | 12.60    |
| 840   | 31  | 13  | 20  | 23  | 13  | 253.84  | 13.63    |
| 841   | 7   | 28  | 16  | 27  | 22  | 275.97  | 16.10    |
| 842   | 25  | 32  | 8   | 28  | 7   | 239.08  | 14.65    |
| 843   | 7   | 15  | 30  | 34  | 14  | 289.02  | 16.74    |
| 844   | 24  | 16  | 24  | 17  | 19  | 270.03  | 13.99    |
| 845   | 14  | 31  | 12  | 26  | 17  | 262.30  | 15.07    |
| 846   | 28  | 26  | 8   | 28  | 10  | 236.96  | 13.81    |
| 847   | 27  | 18  | 6   | 31  | 18  | 252.32  | 13.44    |
| 848   | 6   | 23  | 17  | 28  | 26  | 289.21  | 15.63    |
| 849   | 7   | 29  | 22  | 33  | 9   | 274.06  | 16.82    |



|     |    |    |    |    |    |        |       |
|-----|----|----|----|----|----|--------|-------|
| 850 | 26 | 35 | 12 | 20 | 7  | 234.90 | 14.87 |
| 851 | 14 | 30 | 17 | 21 | 18 | 263.19 | 15.57 |
| 852 | 9  | 22 | 22 | 19 | 28 | 289.91 | 15.55 |
| 853 | 26 | 18 | 32 | 10 | 14 | 258.85 | 14.67 |
| 854 | 16 | 19 | 20 | 34 | 11 | 276.06 | 15.55 |
| 855 | 21 | 13 | 7  | 33 | 26 | 264.56 | 13.44 |
| 856 | 5  | 35 | 21 | 10 | 29 | 280.14 | 16.46 |
| 857 | 31 | 5  | 27 | 26 | 11 | 260.67 | 14.10 |
| 858 | 21 | 31 | 30 | 13 | 5  | 256.79 | 16.05 |
| 859 | 25 | 31 | 15 | 10 | 19 | 241.74 | 14.58 |
| 860 | 21 | 26 | 25 | 22 | 6  | 252.52 | 15.73 |
| 861 | 32 | 31 | 15 | 13 | 9  | 231.07 | 14.49 |
| 862 | 18 | 26 | 10 | 23 | 23 | 262.63 | 14.06 |
| 863 | 26 | 24 | 12 | 31 | 7  | 241.82 | 14.68 |
| 864 | 22 | 9  | 26 | 26 | 17 | 272.48 | 14.45 |
| 865 | 22 | 28 | 13 | 6  | 31 | 254.91 | 13.52 |
| 866 | 16 | 16 | 22 | 25 | 21 | 282.14 | 14.92 |
| 867 | 30 | 10 | 16 | 14 | 30 | 267.09 | 12.59 |
| 868 | 32 | 8  | 25 | 10 | 25 | 265.86 | 13.07 |
| 869 | 33 | 10 | 16 | 12 | 29 | 259.73 | 12.39 |
| 870 | 34 | 18 | 16 | 10 | 22 | 245.93 | 12.78 |
| 871 | 28 | 8  | 33 | 21 | 10 | 271.27 | 14.68 |
| 872 | 18 | 23 | 26 | 5  | 28 | 271.53 | 14.64 |
| 873 | 30 | 19 | 6  | 29 | 16 | 243.58 | 12.98 |
| 874 | 5  | 34 | 22 | 9  | 30 | 284.15 | 16.80 |
| 875 | 22 | 29 | 10 | 12 | 27 | 252.47 | 13.75 |
| 876 | 15 | 30 | 11 | 32 | 12 | 253.42 | 15.48 |
| 877 | 14 | 14 | 21 | 33 | 18 | 283.25 | 15.30 |
| 878 | 24 | 28 | 13 | 7  | 28 | 252.38 | 13.25 |
| 879 | 29 | 12 | 11 | 22 | 26 | 261.68 | 12.76 |
| 880 | 22 | 19 | 18 | 19 | 22 | 267.34 | 14.18 |
| 881 | 19 | 14 | 33 | 28 | 6  | 272.43 | 15.91 |
| 882 | 20 | 8  | 24 | 17 | 31 | 286.62 | 14.23 |
| 883 | 20 | 32 | 20 | 15 | 13 | 255.44 | 15.34 |
| 884 | 6  | 28 | 25 | 16 | 25 | 288.26 | 16.70 |
| 885 | 11 | 17 | 35 | 18 | 19 | 290.61 | 16.11 |
| 886 | 19 | 17 | 21 | 30 | 13 | 269.14 | 15.00 |
| 887 | 25 | 27 | 8  | 7  | 33 | 253.33 | 12.64 |
| 888 | 7  | 21 | 33 | 22 | 17 | 295.19 | 17.28 |
| 889 | 15 | 12 | 17 | 31 | 25 | 285.75 | 14.61 |
| 890 | 22 | 26 | 25 | 5  | 22 | 261.74 | 14.64 |
| 891 | 15 | 22 | 22 | 19 | 22 | 274.93 | 15.14 |
| 892 | 22 | 29 | 8  | 19 | 22 | 247.88 | 13.87 |
| 893 | 21 | 7  | 32 | 17 | 23 | 278.92 | 14.89 |
| 894 | 21 | 30 | 26 | 17 | 6  | 254.56 | 16.04 |
| 895 | 26 | 25 | 8  | 23 | 18 | 246.16 | 13.62 |
| 896 | 23 | 16 | 35 | 12 | 14 | 269.57 | 15.19 |
| 897 | 16 | 19 | 24 | 12 | 29 | 280.54 | 14.90 |
| 898 | 28 | 7  | 29 | 15 | 21 | 273.84 | 13.86 |
| 899 | 13 | 34 | 20 | 23 | 10 | 259.43 | 16.05 |
| 900 | 23 | 10 | 13 | 19 | 35 | 274.84 | 13.07 |
